# Supplementary material for: Mechanism and chemoselectivity origins of bioconjugation of cysteine with Au(iii)-aryl reagents
Source: Royal Society of Chemistry journal article supplement (doi:10.1039/c8ob03143f), 2019-01-01
Supplement: c8ob03143f1.pdf [file c8ob03143f1.pdf]

## Supporting Information

### **Mechanism and chemoselectivity origins of bioconjugation of cysteine with Au(III)-aryl reagents**

Song-Lin Zhang\* and Jia-Jia Dong

*Key Laboratory of Synthetic and Biological Colloids, Ministry of Education, School  
of Chemical and Material Engineering, Jiangnan University, Wuxi 214122, Jiangsu  
Province, China*

E-mail: slzhang@jiangnan.edu.cn

#### Contents

|                                                                     |     |
|---------------------------------------------------------------------|-----|
| 1. Additional computational results -----                           | S2  |
| 2. Optimized Cartesian Coordinates of Stationary Points -----       | S4  |
| 3. Solution-Phase Electronic Energies and Thermal Corrections ----- | S41 |
| 4. Full citation of Gaussian09 program-----                         | S42 |

## 1. Additional computational results

(a) The LAu(I) with counteranion

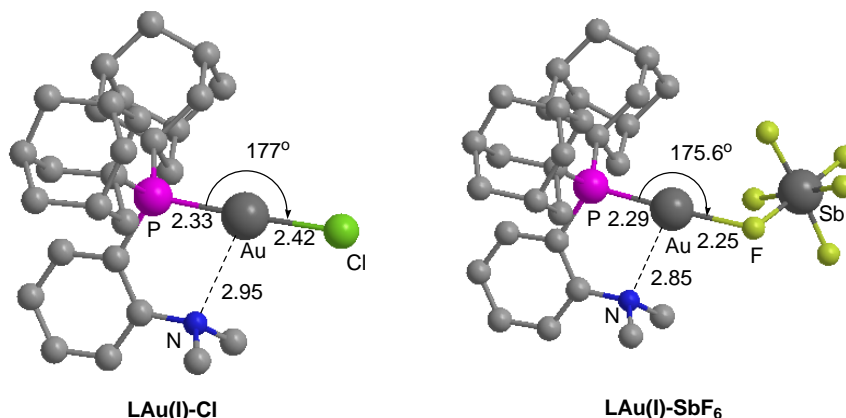

**Figure S1.** The LAu(I) with a counteranion of Cl<sup>-</sup> or SbF<sub>6</sub><sup>-</sup>. Both show a linear geometry around the Au(I) center with a bystanding dimethylamino group.

(b) ωb97xd-predicted reaction energy profile of the favored pathway in Scheme 2

Scheme S1. ωb97xd/SDD for Au and 6-311+g(d,p) for the other atoms predicted reaction energy profile

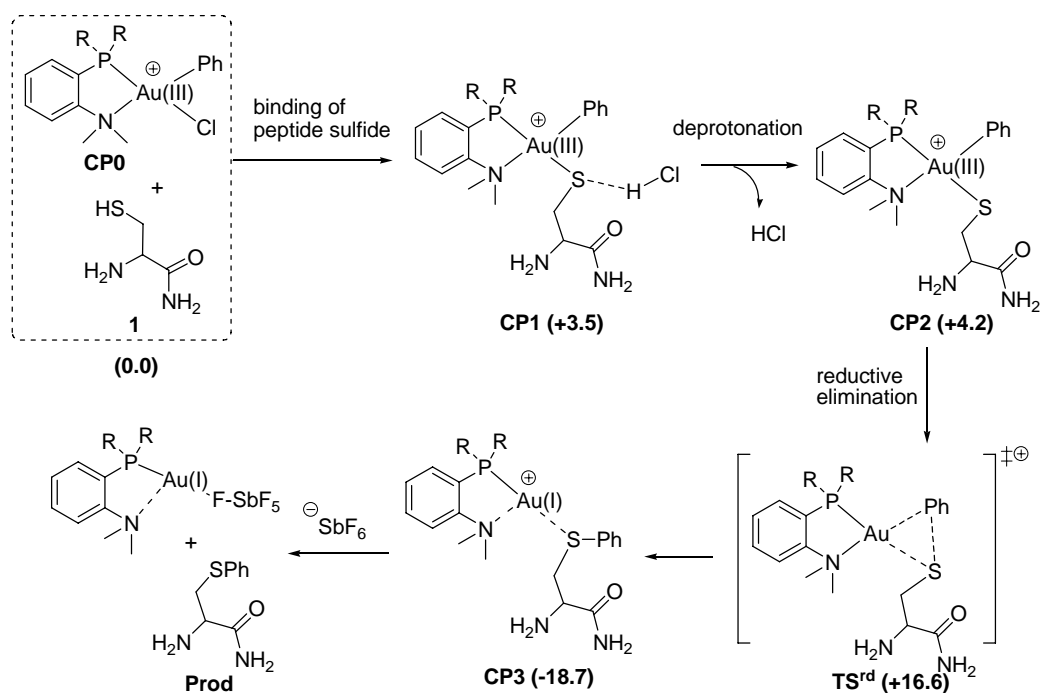

(c) Comparison of b3lyp and  $\omega$ b97xd optimized key intermediate and transition state

$\omega$ b97xd structures

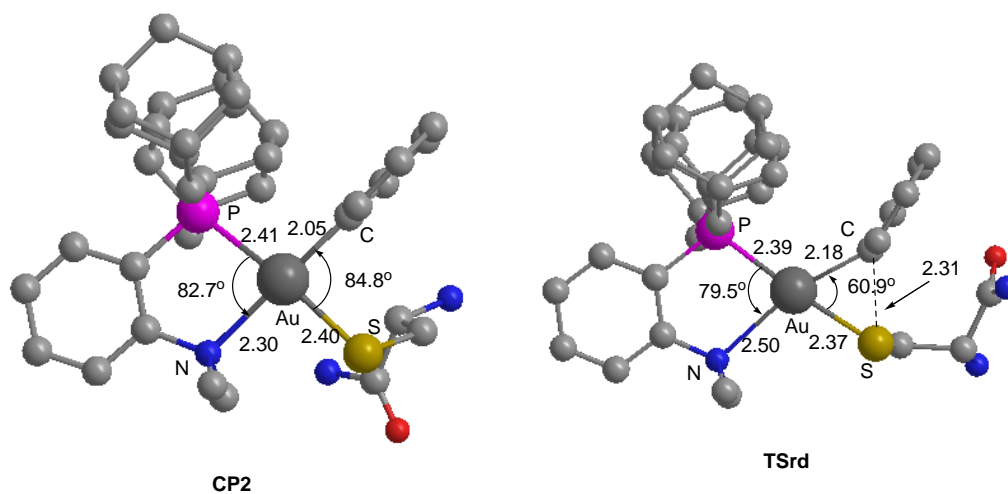

b3lyp structures

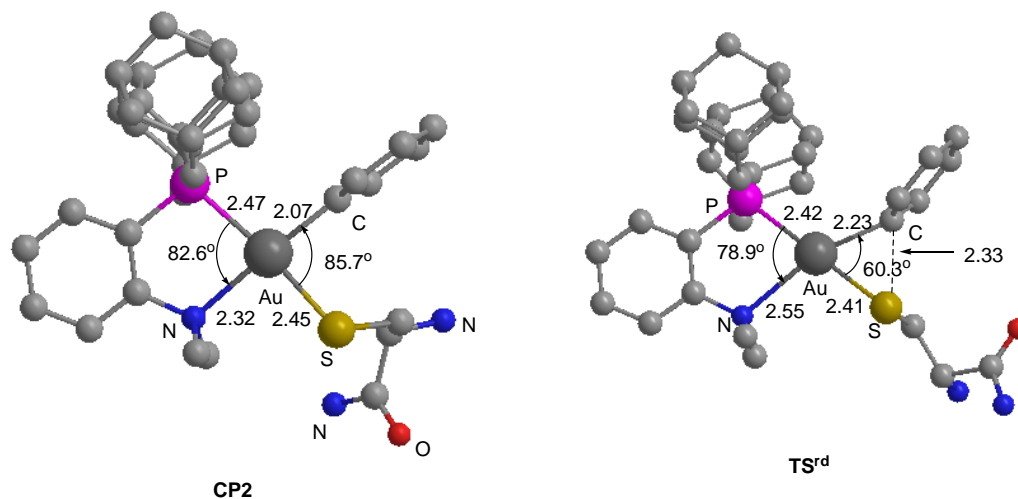

**Figure S2.** Comparison of key structures of **CP2** and **TS<sup>rd</sup>** using  $\omega$ b97xd and b3lyp methods with the same basis set of LANL2DZ+ECP for Au and 6-31g\* for the other atoms.

As can be seen, very similar structures are obtained using  $\omega$ b97xd and b3lyp.

## 2. Optimized Cartesian Coordinates of Stationary Points

CP0

SCF Done: E(RB3LYP) = -2314.37728692 A.U.; No imaginary frequency

| Center<br>Number | Atomic<br>Number | Atomic<br>Type | Coordinates (Angstroms) |           |           |
|------------------|------------------|----------------|-------------------------|-----------|-----------|
|                  |                  |                | X                       | Y         | Z         |
| 1                | 6                | 0              | -3.005845               | 3.056803  | 2.597921  |
| 2                | 6                | 0              | -1.468609               | 3.112684  | 2.525374  |
| 3                | 6                | 0              | -1.030720               | 4.281451  | 1.623162  |
| 4                | 6                | 0              | -1.599643               | 4.068183  | 0.208098  |
| 5                | 6                | 0              | -3.138332               | 4.008086  | 0.268203  |
| 6                | 6                | 0              | -3.567175               | 2.843285  | 1.180961  |
| 7                | 6                | 0              | -0.927886               | 1.781113  | 1.953706  |
| 8                | 6                | 0              | -1.484779               | 1.551740  | 0.524086  |
| 9                | 6                | 0              | -1.054750               | 2.744146  | -0.377957 |
| 10               | 6                | 0              | -3.036228               | 1.508776  | 0.601567  |
| 11               | 15               | 0              | -0.743710               | -0.038003 | -0.256405 |
| 12               | 6                | 0              | -1.227081               | -0.045450 | -2.037060 |
| 13               | 6                | 0              | -0.262616               | 0.011030  | -3.057844 |
| 14               | 6                | 0              | -0.662823               | 0.005189  | -4.399650 |
| 15               | 6                | 0              | -2.010075               | -0.048333 | -4.743692 |
| 16               | 6                | 0              | -2.977960               | -0.098874 | -3.742148 |
| 17               | 6                | 0              | -2.587106               | -0.099820 | -2.406792 |
| 18               | 7                | 0              | 1.177175                | 0.080365  | -2.759399 |
| 19               | 6                | 0              | 1.762934                | 1.337748  | -3.325989 |
| 20               | 79               | 0              | 1.645405                | 0.101678  | -0.515107 |
| 21               | 17               | 0              | 4.059546                | 0.202299  | -0.971932 |
| 22               | 6                | 0              | 2.225918                | 0.132849  | 1.470314  |
| 23               | 6                | 0              | 2.439930                | -1.059596 | 2.158902  |
| 24               | 6                | 0              | 2.967274                | -1.016989 | 3.456930  |
| 25               | 6                | 0              | 3.282505                | 0.205562  | 4.050619  |
| 26               | 6                | 0              | 3.082709                | 1.392005  | 3.341398  |
| 27               | 6                | 0              | 2.558470                | 1.360802  | 2.044113  |
| 28               | 6                | 0              | -1.275012               | -1.730176 | 0.480830  |
| 29               | 6                | 0              | -0.335332               | -2.811335 | -0.126051 |
| 30               | 6                | 0              | -0.679233               | -4.199866 | 0.461092  |
| 31               | 6                | 0              | -2.133891               | -4.562131 | 0.108485  |
| 32               | 6                | 0              | -3.077557               | -3.504698 | 0.711310  |
| 33               | 6                | 0              | -2.737499               | -2.114477 | 0.117002  |
| 34               | 6                | 0              | -0.507461               | -4.168926 | 1.992317  |
| 35               | 6                | 0              | -1.464426               | -3.121394 | 2.593234  |
| 36               | 6                | 0              | -1.138722               | -1.718994 | 2.026268  |
| 37               | 6                | 0              | -2.920096               | -3.480860 | 2.242443  |
| 38               | 6                | 0              | 1.880854                | -1.114430 | -3.327943 |
| 39               | 1                | 0              | 0.079307                | 0.043147  | -5.188713 |
| 40               | 1                | 0              | -2.297185               | -0.050574 | -5.790382 |
| 41               | 1                | 0              | -4.033067               | -0.140635 | -3.992061 |
| 42               | 1                | 0              | -3.356796               | -0.149853 | -1.650553 |
| 43               | 1                | 0              | 0.039580                | 2.798245  | -0.443187 |
| 44               | 1                | 0              | -1.437465               | 2.612017  | -1.396125 |
| 45               | 1                | 0              | -1.283361               | 4.886126  | -0.450896 |
| 46               | 1                | 0              | 1.229568                | 2.196200  | -2.915215 |
| 47               | 1                | 0              | 1.681230                | 1.345393  | -4.417127 |
| 48               | 1                | 0              | 2.814003                | 1.386074  | -3.042354 |
| 49               | 1                | 0              | 0.065180                | 4.344243  | 1.586580  |

|    |   |   |           |           |           |
|----|---|---|-----------|-----------|-----------|
| 50 | 1 | 0 | -1.393647 | 5.232201  | 2.035361  |
| 51 | 1 | 0 | -1.051027 | 3.241511  | 3.531622  |
| 52 | 1 | 0 | -3.325733 | 2.241575  | 3.260751  |
| 53 | 1 | 0 | -3.399150 | 3.990292  | 3.021319  |
| 54 | 1 | 0 | -4.661770 | 2.779998  | 1.216250  |
| 55 | 1 | 0 | -3.473965 | 1.367098  | -0.389304 |
| 56 | 1 | 0 | -3.366809 | 0.680696  | 1.238004  |
| 57 | 1 | 0 | -3.536713 | 4.954352  | 0.656641  |
| 58 | 1 | 0 | -3.552493 | 3.873479  | -0.740007 |
| 59 | 1 | 0 | -1.216899 | 0.963525  | 2.619969  |
| 60 | 1 | 0 | 0.161985  | 1.810218  | 1.933757  |
| 61 | 1 | 0 | -0.447241 | -2.838028 | -1.216974 |
| 62 | 1 | 0 | 0.714746  | -2.579723 | 0.085320  |
| 63 | 1 | 0 | 0.007078  | -4.934278 | 0.022116  |
| 64 | 1 | 0 | 2.934490  | -1.053911 | -3.056761 |
| 65 | 1 | 0 | 1.785252  | -1.136301 | -4.417745 |
| 66 | 1 | 0 | 1.444663  | -2.021351 | -2.905867 |
| 67 | 1 | 0 | -2.380207 | -5.555892 | 0.504346  |
| 68 | 1 | 0 | -2.260329 | -4.607986 | -0.981431 |
| 69 | 1 | 0 | -4.116317 | -3.735330 | 0.444573  |
| 70 | 1 | 0 | -3.608545 | -2.749088 | 2.686004  |
| 71 | 1 | 0 | -3.179127 | -4.462001 | 2.661277  |
| 72 | 1 | 0 | -1.339924 | -3.083728 | 3.682342  |
| 73 | 1 | 0 | -1.840928 | -0.997977 | 2.457612  |
| 74 | 1 | 0 | -0.130980 | -1.417819 | 2.327462  |
| 75 | 1 | 0 | -3.446051 | -1.372639 | 0.500621  |
| 76 | 1 | 0 | -2.860465 | -2.166440 | -0.967913 |
| 77 | 1 | 0 | -0.724959 | -5.159402 | 2.412632  |
| 78 | 1 | 0 | 0.532012  | -3.931580 | 2.255363  |
| 79 | 1 | 0 | 2.426736  | 2.288672  | 1.496883  |
| 80 | 1 | 0 | 3.338518  | 2.348902  | 3.788073  |
| 81 | 1 | 0 | 3.131452  | -1.947358 | 3.993533  |
| 82 | 1 | 0 | 2.223428  | -2.021018 | 1.705997  |
| 83 | 1 | 0 | 3.689698  | 0.234196  | 5.057138  |

Cysteinamide (1)

SCF Done: E(RB3LYP) = -702.056154330 A.U.; No imaginary frequency

| Center<br>Number | Atomic<br>Number | Atomic<br>Type | Coordinates (Angstroms) |           |           |
|------------------|------------------|----------------|-------------------------|-----------|-----------|
|                  |                  |                | X                       | Y         | Z         |
| 1                | 6                | 0              | 1.010443                | 0.847701  | -0.321393 |
| 2                | 6                | 0              | -0.383791               | 0.734588  | 0.299558  |
| 3                | 6                | 0              | -1.065324               | -0.581417 | -0.124799 |
| 4                | 8                | 0              | -0.800772               | -1.152003 | -1.182978 |
| 5                | 16               | 0              | 2.218804                | -0.397126 | 0.293789  |
| 6                | 7                | 0              | -1.212571               | 1.839967  | -0.221380 |
| 7                | 7                | 0              | -2.011199               | -1.030189 | 0.735234  |
| 8                | 1                | 0              | 1.447568                | 1.817572  | -0.066802 |
| 9                | 1                | 0              | 0.938217                | 0.773847  | -1.407493 |
| 10               | 1                | 0              | -0.283637               | 0.745472  | 1.396777  |
| 11               | 1                | 0              | -2.147743               | 1.778946  | 0.180673  |
| 12               | 1                | 0              | -0.828377               | 2.721915  | 0.117888  |
| 13               | 1                | 0              | -2.518368               | -1.877558 | 0.515244  |
| 14               | 1                | 0              | -2.172892               | -0.602413 | 1.635907  |
| 15               | 1                | 0              | 1.668963                | -1.461409 | -0.326167 |

CPI

SCF Done: E(RB3LYP) = -3016.42775083 A.U.; No imaginary frequency

| Center<br>Number | Atomic<br>Number | Atomic<br>Type | Coordinates (Angstroms) |           |           |
|------------------|------------------|----------------|-------------------------|-----------|-----------|
|                  |                  |                | X                       | Y         | Z         |
| 1                | 6                | 0              | 2.847958                | -3.763819 | -2.714779 |
| 2                | 6                | 0              | 2.864989                | -4.073923 | -1.206440 |
| 3                | 6                | 0              | 1.627350                | -4.913876 | -0.837342 |
| 4                | 6                | 0              | 0.356302                | -4.111784 | -1.173199 |
| 5                | 6                | 0              | 0.328050                | -3.790390 | -2.680342 |
| 6                | 6                | 0              | 1.574931                | -2.964501 | -3.050088 |
| 7                | 6                | 0              | 2.856804                | -2.757427 | -0.390210 |
| 8                | 6                | 0              | 1.585241                | -1.931860 | -0.731620 |
| 9                | 6                | 0              | 0.344638                | -2.794496 | -0.364899 |
| 10               | 6                | 0              | 1.585719                | -1.637342 | -2.255092 |
| 11               | 15               | 0              | 1.426853                | -0.303422 | 0.271996  |
| 12               | 79               | 0              | -0.910849               | 0.422830  | 0.441790  |
| 13               | 17               | 0              | -3.615804               | 4.430597  | 0.279536  |
| 14               | 6                | 0              | 2.635585                | 1.125969  | -0.165547 |
| 15               | 6                | 0              | 2.320835                | 1.697541  | -1.573679 |
| 16               | 6                | 0              | 3.215990                | 2.925155  | -1.863343 |
| 17               | 6                | 0              | 4.695354                | 2.499655  | -1.832378 |
| 18               | 6                | 0              | 5.025575                | 1.938657  | -0.437238 |
| 19               | 6                | 0              | 4.131543                | 0.710438  | -0.134630 |
| 20               | 6                | 0              | 4.782548                | 3.022391  | 0.630701  |
| 21               | 6                | 0              | 3.304842                | 3.457074  | 0.589083  |
| 22               | 6                | 0              | 2.966375                | 4.016945  | -0.805814 |
| 23               | 6                | 0              | 2.397907                | 2.242200  | 0.891531  |
| 24               | 6                | 0              | 1.735788                | -0.736785 | 2.038887  |
| 25               | 6                | 0              | 0.730587                | -0.600106 | 3.011653  |
| 26               | 6                | 0              | 1.004213                | -0.919716 | 4.348587  |
| 27               | 6                | 0              | 2.261962                | -1.370815 | 4.735924  |
| 28               | 6                | 0              | 3.267662                | -1.514347 | 3.781957  |
| 29               | 6                | 0              | 3.001657                | -1.202260 | 2.452597  |
| 30               | 7                | 0              | -0.627685               | -0.136661 | 2.673832  |
| 31               | 6                | 0              | -1.618237               | -1.213874 | 2.990724  |
| 32               | 6                | 0              | -0.952488               | 1.102366  | 3.448263  |
| 33               | 16               | 0              | -3.236859               | 1.103324  | 0.874904  |
| 34               | 6                | 0              | -4.360207               | 0.369654  | -0.388457 |
| 35               | 6                | 0              | -5.038045               | -0.926019 | 0.067695  |
| 36               | 6                | 0              | -4.031293               | -2.090097 | 0.144751  |
| 37               | 8                | 0              | -3.109671               | -2.224912 | -0.662544 |
| 38               | 6                | 0              | -1.219137               | 1.037326  | -1.507631 |
| 39               | 6                | 0              | -1.602720               | 0.122232  | -2.488032 |
| 40               | 6                | 0              | -1.831529               | 0.571846  | -3.796465 |
| 41               | 6                | 0              | -1.691378               | 1.922894  | -4.115008 |
| 42               | 6                | 0              | -1.333859               | 2.833919  | -3.118302 |
| 43               | 6                | 0              | -1.099684               | 2.395639  | -1.809636 |
| 44               | 7                | 0              | -6.041936               | -1.292117 | -0.950882 |
| 45               | 7                | 0              | -4.270634               | -2.980536 | 1.135294  |
| 46               | 1                | 0              | 0.231651                | -0.819764 | 5.102098  |
| 47               | 1                | 0              | 2.449056                | -1.610351 | 5.777944  |
| 48               | 1                | 0              | 4.253921                | -1.868430 | 4.064169  |
| 49               | 1                | 0              | 3.794334                | -1.332231 | 1.730275  |
| 50               | 1                | 0              | 1.347692                | 2.562074  | 0.878247  |
| 51               | 1                | 0              | 2.612848                | 1.866230  | 1.898595  |

|    |   |   |           |           |           |
|----|---|---|-----------|-----------|-----------|
| 52 | 1 | 0 | 3.119035  | 4.221041  | 1.354385  |
| 53 | 1 | 0 | -0.228955 | 1.879749  | 3.198806  |
| 54 | 1 | 0 | -0.925404 | 0.911001  | 4.525134  |
| 55 | 1 | 0 | -1.956627 | 1.431774  | 3.179209  |
| 56 | 1 | 0 | 1.918956  | 4.346086  | -0.838087 |
| 57 | 1 | 0 | 3.587093  | 4.897172  | -1.019311 |
| 58 | 1 | 0 | 2.956713  | 3.305222  | -2.859449 |
| 59 | 1 | 0 | 4.888957  | 1.741242  | -2.603011 |
| 60 | 1 | 0 | 5.342508  | 3.358230  | -2.055599 |
| 61 | 1 | 0 | 6.071690  | 1.609636  | -0.403268 |
| 62 | 1 | 0 | 4.410806  | 0.322818  | 0.847936  |
| 63 | 1 | 0 | 4.326544  | -0.074626 | -0.873916 |
| 64 | 1 | 0 | 5.433465  | 3.886550  | 0.443203  |
| 65 | 1 | 0 | 5.037565  | 2.637837  | 1.627546  |
| 66 | 1 | 0 | 2.498068  | 0.942146  | -2.344038 |
| 67 | 1 | 0 | 1.271297  | 1.985934  | -1.641150 |
| 68 | 1 | 0 | 0.357690  | -3.026152 | 0.708380  |
| 69 | 1 | 0 | -0.587478 | -2.256200 | -0.566974 |
| 70 | 1 | 0 | -0.535990 | -4.687908 | -0.898131 |
| 71 | 1 | 0 | -2.611973 | -0.864318 | 2.713841  |
| 72 | 1 | 0 | -1.602614 | -1.454568 | 4.058218  |
| 73 | 1 | 0 | -1.370750 | -2.105101 | 2.412489  |
| 74 | 1 | 0 | 1.635394  | -5.859733 | -1.394919 |
| 75 | 1 | 0 | 1.645061  | -5.167974 | 0.231044  |
| 76 | 1 | 0 | 3.779017  | -4.623274 | -0.948076 |
| 77 | 1 | 0 | 3.741263  | -3.190457 | -2.997153 |
| 78 | 1 | 0 | 2.870384  | -4.699152 | -3.289448 |
| 79 | 1 | 0 | 1.557297  | -2.720653 | -4.119612 |
| 80 | 1 | 0 | 2.486066  | -1.076370 | -2.526368 |
| 81 | 1 | 0 | 0.721970  | -1.026775 | -2.536326 |
| 82 | 1 | 0 | 3.766434  | -2.187206 | -0.609893 |
| 83 | 1 | 0 | 2.871682  | -3.011660 | 0.673246  |
| 84 | 1 | 0 | 0.309704  | -4.721571 | -3.261888 |
| 85 | 1 | 0 | -0.585520 | -3.236440 | -2.934014 |
| 86 | 1 | 0 | -0.834334 | 3.117256  | -1.044096 |
| 87 | 1 | 0 | -1.240360 | 3.891593  | -3.349437 |
| 88 | 1 | 0 | -2.124882 | -0.144191 | -4.559525 |
| 89 | 1 | 0 | -1.766452 | -0.920723 | -2.241545 |
| 90 | 1 | 0 | -1.870568 | 2.266718  | -5.129746 |
| 91 | 1 | 0 | -5.125591 | 1.129408  | -0.577108 |
| 92 | 1 | 0 | -3.811169 | 0.197160  | -1.313559 |
| 93 | 1 | 0 | -5.476527 | -0.766015 | 1.065786  |
| 94 | 1 | 0 | -6.521106 | -2.144430 | -0.660314 |
| 95 | 1 | 0 | -6.762267 | -0.570123 | -0.968787 |
| 96 | 1 | 0 | -3.690428 | -3.805973 | 1.213885  |
| 97 | 1 | 0 | -5.021260 | -2.862871 | 1.800804  |
| 98 | 1 | 0 | -3.403035 | 3.096489  | 0.467130  |

**CP2**

SCF Done: E(RB3LYP) = -2555.62089144 A.U.; No imaginary frequency

| Center<br>Number | Atomic<br>Number | Atomic<br>Type | Coordinates (Angstroms) |           |          |
|------------------|------------------|----------------|-------------------------|-----------|----------|
|                  |                  |                | X                       | Y         | Z        |
| 1                | 6                | 0              | 1.629938                | -1.231909 | 2.350117 |
| 2                | 6                | 0              | 1.095628                | -1.732017 | 1.160604 |
| 3                | 6                | 0              | 0.699056                | -3.068822 | 1.078490 |

|    |    |   |           |           |           |
|----|----|---|-----------|-----------|-----------|
| 4  | 6  | 0 | 0.805622  | -3.895821 | 2.203619  |
| 5  | 6  | 0 | 1.316740  | -3.395307 | 3.402854  |
| 6  | 6  | 0 | 1.732952  | -2.064949 | 3.471851  |
| 7  | 79 | 0 | 0.977620  | -0.526852 | -0.515468 |
| 8  | 16 | 0 | 3.145721  | -1.478672 | -1.128585 |
| 9  | 6  | 0 | 4.298031  | -1.413225 | 0.300169  |
| 10 | 6  | 0 | 4.744552  | -0.004945 | 0.700331  |
| 11 | 7  | 0 | 5.579575  | -0.112040 | 1.911851  |
| 12 | 15 | 0 | -1.285844 | 0.418300  | -0.232268 |
| 13 | 6  | 0 | -1.410550 | 1.387602  | -1.795874 |
| 14 | 6  | 0 | -0.333797 | 1.451751  | -2.697629 |
| 15 | 6  | 0 | -0.441208 | 2.228008  | -3.859769 |
| 16 | 6  | 0 | -1.600901 | 2.943023  | -4.141239 |
| 17 | 6  | 0 | -2.675728 | 2.891032  | -3.255482 |
| 18 | 6  | 0 | -2.575447 | 2.122904  | -2.099825 |
| 19 | 7  | 0 | 0.931209  | 0.730307  | -2.463144 |
| 20 | 6  | 0 | 2.063300  | 1.704624  | -2.359230 |
| 21 | 6  | 0 | -2.638363 | -0.939895 | -0.296239 |
| 22 | 6  | 0 | -4.044426 | -0.423859 | -0.709782 |
| 23 | 6  | 0 | -5.049421 | -1.601640 | -0.750917 |
| 24 | 6  | 0 | -5.134596 | -2.274352 | 0.631770  |
| 25 | 6  | 0 | -3.743209 | -2.809231 | 1.019454  |
| 26 | 6  | 0 | -2.747602 | -1.628794 | 1.089754  |
| 27 | 6  | 0 | -3.268267 | -3.834982 | -0.028038 |
| 28 | 6  | 0 | -3.194581 | -3.157035 | -1.410558 |
| 29 | 6  | 0 | -4.587766 | -2.629211 | -1.801238 |
| 30 | 6  | 0 | -2.189562 | -1.982970 | -1.359281 |
| 31 | 6  | 0 | -1.431056 | 1.697778  | 1.194771  |
| 32 | 6  | 0 | -1.015596 | 1.055296  | 2.544638  |
| 33 | 6  | 0 | -1.017397 | 2.119669  | 3.666841  |
| 34 | 6  | 0 | -2.431287 | 2.711300  | 3.816119  |
| 35 | 6  | 0 | -2.844367 | 3.366305  | 2.485405  |
| 36 | 6  | 0 | -2.851571 | 2.303043  | 1.358857  |
| 37 | 6  | 0 | -0.019265 | 3.240677  | 3.321168  |
| 38 | 6  | 0 | -0.437331 | 3.897886  | 1.992274  |
| 39 | 6  | 0 | -0.427496 | 2.838880  | 0.866115  |
| 40 | 6  | 0 | -1.853386 | 4.490572  | 2.127855  |
| 41 | 6  | 0 | 1.182007  | -0.224244 | -3.588915 |
| 42 | 6  | 0 | 5.623192  | 0.613755  | -0.405706 |
| 43 | 7  | 0 | 5.421509  | 1.937887  | -0.620389 |
| 44 | 8  | 0 | 6.466886  | -0.038665 | -1.017291 |
| 45 | 1  | 0 | 0.387311  | 2.282667  | -4.556408 |
| 46 | 1  | 0 | -1.658597 | 3.537574  | -5.047568 |
| 47 | 1  | 0 | -3.587887 | 3.443418  | -3.457164 |
| 48 | 1  | 0 | -3.421629 | 2.098936  | -1.428595 |
| 49 | 1  | 0 | 0.586147  | 2.429616  | 0.761855  |
| 50 | 1  | 0 | -0.688135 | 3.316187  | -0.084889 |
| 51 | 1  | 0 | 0.274611  | 4.688759  | 1.724956  |
| 52 | 1  | 0 | 1.857635  | 2.404017  | -1.547387 |
| 53 | 1  | 0 | 2.187009  | 2.259623  | -3.294584 |
| 54 | 1  | 0 | 2.976604  | 1.151615  | -2.141609 |
| 55 | 1  | 0 | 0.997195  | 2.832192  | 3.239049  |
| 56 | 1  | 0 | -0.002116 | 3.990218  | 4.123391  |
| 57 | 1  | 0 | -0.717197 | 1.628659  | 4.601070  |
| 58 | 1  | 0 | -3.146768 | 1.924463  | 4.091086  |
| 59 | 1  | 0 | -2.445856 | 3.456209  | 4.622819  |
| 60 | 1  | 0 | -3.858616 | 3.776411  | 2.568811  |
| 61 | 1  | 0 | -3.184566 | 2.782066  | 0.434216  |



|    |   |   |           |           |           |
|----|---|---|-----------|-----------|-----------|
| 62 | 1 | 0 | -3.574880 | 1.518850  | 1.607607  |
| 63 | 1 | 0 | -1.864675 | 5.262112  | 2.908884  |
| 64 | 1 | 0 | -2.153144 | 4.976723  | 1.189628  |
| 65 | 1 | 0 | -1.698326 | 0.245548  | 2.818236  |
| 66 | 1 | 0 | -0.019585 | 0.619294  | 2.459323  |
| 67 | 1 | 0 | -2.125513 | -1.508353 | -2.346815 |
| 68 | 1 | 0 | -1.192294 | -2.368761 | -1.121187 |
| 69 | 1 | 0 | -2.842975 | -3.876341 | -2.160765 |
| 70 | 1 | 0 | 2.121730  | -0.745348 | -3.404125 |
| 71 | 1 | 0 | 1.257633  | 0.306016  | -4.542990 |
| 72 | 1 | 0 | 0.362655  | -0.943103 | -3.636626 |
| 73 | 1 | 0 | -5.302780 | -3.460794 | -1.856018 |
| 74 | 1 | 0 | -4.554191 | -2.166492 | -2.796798 |
| 75 | 1 | 0 | -6.030235 | -1.197335 | -1.030946 |
| 76 | 1 | 0 | -5.487041 | -1.555228 | 1.383640  |
| 77 | 1 | 0 | -5.862701 | -3.095778 | 0.605483  |
| 78 | 1 | 0 | -3.786050 | -3.280205 | 2.009412  |
| 79 | 1 | 0 | -3.106904 | -0.912310 | 1.836159  |
| 80 | 1 | 0 | -1.767444 | -1.986782 | 1.421470  |
| 81 | 1 | 0 | -4.406604 | 0.337378  | -0.011053 |
| 82 | 1 | 0 | -4.003651 | 0.028111  | -1.704770 |
| 83 | 1 | 0 | -3.963899 | -4.683645 | -0.064799 |
| 84 | 1 | 0 | -2.286067 | -4.237551 | 0.252835  |
| 85 | 1 | 0 | 1.978448  | -0.206402 | 2.417733  |
| 86 | 1 | 0 | 2.143418  | -1.664936 | 4.395105  |
| 87 | 1 | 0 | 0.493315  | -4.934142 | 2.131364  |
| 88 | 1 | 0 | 0.322686  | -3.483992 | 0.149650  |
| 89 | 1 | 0 | 1.399136  | -4.039834 | 4.273253  |
| 90 | 1 | 0 | 3.852211  | -1.925096 | 1.155519  |
| 91 | 1 | 0 | 5.176589  | -1.980243 | -0.021928 |
| 92 | 1 | 0 | 3.850628  | 0.623844  | 0.844188  |
| 93 | 1 | 0 | 5.866877  | 0.820674  | 2.208438  |
| 94 | 1 | 0 | 5.003513  | -0.473288 | 2.672086  |
| 95 | 1 | 0 | 6.007486  | 2.427921  | -1.283938 |
| 96 | 1 | 0 | 4.739450  | 2.473321  | -0.102841 |

### HCl

SCF Done: E(RB3LYP) = -460.796000317 A.U.; No imaginary frequency

| Center Number | Atomic Number | Atomic Type | Coordinates (Angstroms) |          |           |
|---------------|---------------|-------------|-------------------------|----------|-----------|
|               |               |             | X                       | Y        | Z         |
| 1             | 17            | 0           | 0.000000                | 0.000000 | 0.071725  |
| 2             | 1             | 0           | 0.000000                | 0.000000 | -1.219330 |

### TS<sup>rd</sup>

SCF Done: E(RB3LYP) = -2555.60197103 A.U.; An imaginary frequency of -257.5484 cm<sup>-1</sup>

| Center Number | Atomic Number | Atomic Type | Coordinates (Angstroms) |          |          |
|---------------|---------------|-------------|-------------------------|----------|----------|
|               |               |             | X                       | Y        | Z        |
| 1             | 6             | 0           | -2.165236               | 1.012188 | 2.190659 |
| 2             | 6             | 0           | -1.931181               | 1.472556 | 0.893897 |
| 3             | 6             | 0           | -1.746200               | 2.834767 | 0.626464 |
| 4             | 6             | 0           | -1.760201               | 3.739450 | 1.690075 |
| 5             | 6             | 0           | -1.976399               | 3.296224 | 2.999540 |

|    |    |   |           |           |           |
|----|----|---|-----------|-----------|-----------|
| 6  | 6  | 0 | -2.180096 | 1.937004  | 3.242317  |
| 7  | 79 | 0 | -0.874759 | 0.092475  | -0.502706 |
| 8  | 16 | 0 | -3.227643 | 0.515963  | -0.795154 |
| 9  | 6  | 0 | -4.071882 | -0.812342 | 0.166509  |
| 10 | 6  | 0 | -5.492757 | -1.026375 | -0.373685 |
| 11 | 7  | 0 | -6.058574 | -2.193780 | 0.326444  |
| 12 | 15 | 0 | 1.494675  | -0.311298 | -0.213174 |
| 13 | 6  | 0 | 1.997318  | -1.258751 | -1.715345 |
| 14 | 6  | 0 | 1.066790  | -1.588220 | -2.726082 |
| 15 | 6  | 0 | 1.492089  | -2.311774 | -3.849537 |
| 16 | 6  | 0 | 2.814497  | -2.724276 | -3.986364 |
| 17 | 6  | 0 | 3.738428  | -2.418581 | -2.987454 |
| 18 | 6  | 0 | 3.328900  | -1.695521 | -1.870173 |
| 19 | 7  | 0 | -0.335473 | -1.205675 | -2.633430 |
| 20 | 6  | 0 | -1.229699 | -2.383938 | -2.602345 |
| 21 | 6  | 0 | 2.453761  | 1.339600  | -0.250100 |
| 22 | 6  | 0 | 3.994862  | 1.220003  | -0.401711 |
| 23 | 6  | 0 | 4.633906  | 2.629427  | -0.447252 |
| 24 | 6  | 0 | 4.300973  | 3.401094  | 0.843908  |
| 25 | 6  | 0 | 2.771890  | 3.543625  | 0.971050  |
| 26 | 6  | 0 | 2.134711  | 2.137212  | 1.042837  |
| 27 | 6  | 0 | 2.217640  | 4.309341  | -0.245798 |
| 28 | 6  | 0 | 2.562011  | 3.536894  | -1.534042 |
| 29 | 6  | 0 | 4.090754  | 3.400298  | -1.665100 |
| 30 | 6  | 0 | 1.917108  | 2.133599  | -1.476905 |
| 31 | 6  | 0 | 1.818186  | -1.441974 | 1.296155  |
| 32 | 6  | 0 | 0.992205  | -0.916231 | 2.503411  |
| 33 | 6  | 0 | 1.131938  | -1.872208 | 3.709412  |
| 34 | 6  | 0 | 2.613412  | -1.977184 | 4.118427  |
| 35 | 6  | 0 | 3.428131  | -2.525928 | 2.931368  |
| 36 | 6  | 0 | 3.303331  | -1.560216 | 1.728361  |
| 37 | 6  | 0 | 0.598757  | -3.264922 | 3.323711  |
| 38 | 6  | 0 | 1.416656  | -3.808679 | 2.136808  |
| 39 | 6  | 0 | 1.284200  | -2.855894 | 0.927509  |
| 40 | 6  | 0 | 2.900490  | -3.919451 | 2.538155  |
| 41 | 6  | 0 | -0.729637 | -0.277947 | -3.716919 |
| 42 | 6  | 0 | -6.379477 | 0.191150  | -0.033784 |
| 43 | 7  | 0 | -7.253540 | 0.547387  | -1.004281 |
| 44 | 8  | 0 | -6.311767 | 0.763139  | 1.052592  |
| 45 | 1  | 0 | 0.776246  | -2.559451 | -4.626775 |
| 46 | 1  | 0 | 3.117424  | -3.284869 | -4.865685 |
| 47 | 1  | 0 | 4.772149  | -2.739025 | -3.072706 |
| 48 | 1  | 0 | 4.062597  | -1.472277 | -1.106805 |
| 49 | 1  | 0 | 0.231219  | -2.791452 | 0.620611  |
| 50 | 1  | 0 | 1.844210  | -3.266246 | 0.080196  |
| 51 | 1  | 0 | 1.036141  | -4.794827 | 1.841707  |
| 52 | 1  | 0 | -0.926724 | -3.049000 | -1.790457 |
| 53 | 1  | 0 | -1.214255 | -2.941616 | -3.548942 |
| 54 | 1  | 0 | -2.251142 | -2.038131 | -2.419305 |
| 55 | 1  | 0 | -0.464690 | -3.202612 | 3.054529  |
| 56 | 1  | 0 | 0.674579  | -3.949624 | 4.178991  |
| 57 | 1  | 0 | 0.543166  | -1.464725 | 4.541096  |
| 58 | 1  | 0 | 2.995591  | -0.991574 | 4.417120  |
| 59 | 1  | 0 | 2.719423  | -2.640790 | 4.986968  |
| 60 | 1  | 0 | 4.488180  | -2.593901 | 3.206900  |
| 61 | 1  | 0 | 3.921616  | -1.934419 | 0.905916  |
| 62 | 1  | 0 | 3.697174  | -0.579147 | 2.016509  |
| 63 | 1  | 0 | 3.011613  | -4.614739 | 3.380930  |

|    |   |   |           |           |           |
|----|---|---|-----------|-----------|-----------|
| 64 | 1 | 0 | 3.489163  | -4.327082 | 1.705019  |
| 65 | 1 | 0 | 1.322528  | 0.086867  | 2.792764  |
| 66 | 1 | 0 | -0.062922 | -0.836343 | 2.222709  |
| 67 | 1 | 0 | 2.138385  | 1.587267  | -2.402817 |
| 68 | 1 | 0 | 0.826878  | 2.240476  | -1.415288 |
| 69 | 1 | 0 | 2.157869  | 4.066575  | -2.406078 |
| 70 | 1 | 0 | -1.755090 | 0.055637  | -3.533506 |
| 71 | 1 | 0 | -0.687815 | -0.756538 | -4.705147 |
| 72 | 1 | 0 | -0.066768 | 0.589936  | -3.712724 |
| 73 | 1 | 0 | 4.554840  | 4.394119  | -1.720811 |
| 74 | 1 | 0 | 4.347231  | 2.872636  | -2.593828 |
| 75 | 1 | 0 | 5.720774  | 2.507766  | -0.538464 |
| 76 | 1 | 0 | 4.705833  | 2.872621  | 1.717893  |
| 77 | 1 | 0 | 4.772841  | 4.392536  | 0.820623  |
| 78 | 1 | 0 | 2.523183  | 4.082237  | 1.894283  |
| 79 | 1 | 0 | 2.534930  | 1.613700  | 1.918568  |
| 80 | 1 | 0 | 1.050502  | 2.224900  | 1.178556  |
| 81 | 1 | 0 | 4.428761  | 0.652779  | 0.428187  |
| 82 | 1 | 0 | 4.243972  | 0.692544  | -1.328001 |
| 83 | 1 | 0 | 2.650401  | 5.317886  | -0.284641 |
| 84 | 1 | 0 | 1.129739  | 4.428622  | -0.154358 |
| 85 | 1 | 0 | -2.317816 | -0.040937 | 2.397880  |
| 86 | 1 | 0 | -2.348517 | 1.579267  | 4.254498  |
| 87 | 1 | 0 | -1.613095 | 4.796502  | 1.485709  |
| 88 | 1 | 0 | -1.608926 | 3.188779  | -0.390060 |
| 89 | 1 | 0 | -1.995462 | 4.006856  | 3.820250  |
| 90 | 1 | 0 | -3.500427 | -1.739524 | 0.096495  |
| 91 | 1 | 0 | -4.145032 | -0.500003 | 1.210423  |
| 92 | 1 | 0 | -5.454340 | -1.158188 | -1.466788 |
| 93 | 1 | 0 | -7.018004 | -2.339017 | 0.011662  |
| 94 | 1 | 0 | -5.548632 | -3.026696 | 0.032604  |
| 95 | 1 | 0 | -7.897770 | 1.309081  | -0.835507 |
| 96 | 1 | 0 | -7.297414 | 0.076950  | -1.896758 |

CP3

SCF Done: E(RB3LYP) = -2555.66109952 A.U.; No imaginary frequency

| Center<br>Number | Atomic<br>Number | Atomic<br>Type | Coordinates (Angstroms) |           |           |
|------------------|------------------|----------------|-------------------------|-----------|-----------|
|                  |                  |                | X                       | Y         | Z         |
| 1                | 6                | 0              | 2.933728                | -3.932560 | 2.407221  |
| 2                | 6                | 0              | 3.332205                | -2.547627 | 2.953858  |
| 3                | 6                | 0              | 2.392799                | -2.157298 | 4.110000  |
| 4                | 6                | 0              | 0.944151                | -2.105710 | 3.588618  |
| 5                | 6                | 0              | 0.537004                | -3.490059 | 3.048921  |
| 6                | 6                | 0              | 1.480443                | -3.880377 | 1.895536  |
| 7                | 6                | 0              | 3.234719                | -1.492902 | 1.824854  |
| 8                | 6                | 0              | 1.784246                | -1.431051 | 1.277524  |
| 9                | 6                | 0              | 0.837543                | -1.058892 | 2.456958  |
| 10               | 6                | 0              | 1.376270                | -2.839402 | 0.758912  |
| 11               | 15               | 0              | 1.487568                | -0.203155 | -0.167267 |
| 12               | 6                | 0              | 2.350392                | 1.493624  | -0.003605 |
| 13               | 6                | 0              | 3.899167                | 1.464782  | -0.085218 |
| 14               | 6                | 0              | 4.463492                | 2.902362  | 0.020780  |
| 15               | 6                | 0              | 4.032979                | 3.538056  | 1.356739  |
| 16               | 6                | 0              | 2.494008                | 3.592143  | 1.420766  |
| 17               | 6                | 0              | 1.928871                | 2.156478  | 1.335228  |

|    |    |   |           |           |           |
|----|----|---|-----------|-----------|-----------|
| 18 | 6  | 0 | 3.932894  | 3.750808  | -1.150286 |
| 19 | 6  | 0 | 2.394269  | 3.799200  | -1.083037 |
| 20 | 6  | 0 | 1.826447  | 2.366212  | -1.181339 |
| 21 | 6  | 0 | 1.953349  | 4.435544  | 0.249892  |
| 22 | 79 | 0 | -0.834865 | 0.159584  | -0.325246 |
| 23 | 7  | 0 | -0.033370 | -0.876910 | -2.901773 |
| 24 | 6  | 0 | -0.351701 | 0.157187  | -3.894197 |
| 25 | 6  | 0 | -3.551661 | 2.135998  | 0.436682  |
| 26 | 6  | 0 | -2.795809 | 2.559124  | 1.536876  |
| 27 | 6  | 0 | -3.072879 | 3.795456  | 2.121733  |
| 28 | 6  | 0 | -4.088887 | 4.606021  | 1.606095  |
| 29 | 6  | 0 | -4.834473 | 4.179985  | 0.504990  |
| 30 | 6  | 0 | -4.570902 | 2.940711  | -0.084357 |
| 31 | 16 | 0 | -3.254956 | 0.544976  | -0.359135 |
| 32 | 6  | 0 | -3.931854 | -0.624056 | 0.910261  |
| 33 | 6  | 0 | -3.810073 | -2.075798 | 0.444465  |
| 34 | 6  | 0 | -4.799643 | -2.355228 | -0.708219 |
| 35 | 8  | 0 | -5.870766 | -1.761604 | -0.810394 |
| 36 | 7  | 0 | -4.199507 | -2.932699 | 1.578824  |
| 37 | 6  | 0 | 2.159844  | -0.980195 | -1.707940 |
| 38 | 6  | 0 | 1.370010  | -1.211289 | -2.861503 |
| 39 | 6  | 0 | 1.964387  | -1.791321 | -3.993673 |
| 40 | 6  | 0 | 3.307685  | -2.154825 | -4.011132 |
| 41 | 6  | 0 | 4.089376  | -1.942170 | -2.875906 |
| 42 | 6  | 0 | 3.517768  | -1.361696 | -1.746517 |
| 43 | 6  | 0 | -0.890856 | -2.059692 | -3.051871 |
| 44 | 7  | 0 | -4.405645 | -3.327744 | -1.564267 |
| 45 | 1  | 0 | 1.354845  | -1.962079 | -4.876154 |
| 46 | 1  | 0 | 3.738534  | -2.602429 | -4.902193 |
| 47 | 1  | 0 | 5.138347  | -2.222308 | -2.864482 |
| 48 | 1  | 0 | 4.149892  | -1.205061 | -0.882332 |
| 49 | 1  | 0 | 0.347407  | -2.812287 | 0.374048  |
| 50 | 1  | 0 | 2.023926  | -3.142094 | -0.071059 |
| 51 | 1  | 0 | 1.192537  | -4.860287 | 1.493738  |
| 52 | 1  | 0 | -0.653254 | -2.784753 | -2.268549 |
| 53 | 1  | 0 | -0.782680 | -2.554411 | -4.031683 |
| 54 | 1  | 0 | -1.936069 | -1.756169 | -2.935503 |
| 55 | 1  | 0 | -0.503865 | -3.468948 | 2.696949  |
| 56 | 1  | 0 | 0.590519  | -4.239204 | 3.850229  |
| 57 | 1  | 0 | 0.266635  | -1.806865 | 4.398730  |
| 58 | 1  | 0 | 2.683145  | -1.181033 | 4.521717  |
| 59 | 1  | 0 | 2.475276  | -2.888067 | 4.925686  |
| 60 | 1  | 0 | 4.370074  | -2.573100 | 3.309627  |
| 61 | 1  | 0 | 3.942038  | -1.757740 | 1.033003  |
| 62 | 1  | 0 | 3.534640  | -0.516285 | 2.220997  |
| 63 | 1  | 0 | 3.027864  | -4.689042 | 3.197729  |
| 64 | 1  | 0 | 3.610760  | -4.229541 | 1.594618  |
| 65 | 1  | 0 | 1.085723  | -0.068461 | 2.853389  |
| 66 | 1  | 0 | -0.199362 | -1.009333 | 2.101963  |
| 67 | 1  | 0 | 2.120985  | 1.917354  | -2.138543 |
| 68 | 1  | 0 | 0.729313  | 2.404281  | -1.165207 |
| 69 | 1  | 0 | 2.002012  | 4.385489  | -1.923815 |
| 70 | 1  | 0 | -1.399224 | 0.451530  | -3.771747 |
| 71 | 1  | 0 | -0.208913 | -0.179042 | -4.934964 |
| 72 | 1  | 0 | 0.276323  | 1.035665  | -3.724076 |
| 73 | 1  | 0 | 4.345130  | 4.767382  | -1.097602 |
| 74 | 1  | 0 | 4.256478  | 3.319995  | -2.107607 |
| 75 | 1  | 0 | 5.558346  | 2.844417  | -0.028014 |

|    |   |   |           |           |           |
|----|---|---|-----------|-----------|-----------|
| 76 | 1 | 0 | 4.426159  | 2.953798  | 2.200038  |
| 77 | 1 | 0 | 4.450459  | 4.550043  | 1.444196  |
| 78 | 1 | 0 | 2.176074  | 4.032377  | 2.374424  |
| 79 | 1 | 0 | 2.307824  | 1.574331  | 2.183038  |
| 80 | 1 | 0 | 0.834306  | 2.179325  | 1.417634  |
| 81 | 1 | 0 | 4.323127  | 0.849895  | 0.715396  |
| 82 | 1 | 0 | 4.218293  | 1.031040  | -1.037974 |
| 83 | 1 | 0 | 2.333086  | 5.463722  | 0.320010  |
| 84 | 1 | 0 | 0.857255  | 4.493205  | 0.298689  |
| 85 | 1 | 0 | -2.000450 | 1.931259  | 1.926247  |
| 86 | 1 | 0 | -2.490084 | 4.126567  | 2.976157  |
| 87 | 1 | 0 | -5.623119 | 4.808184  | 0.101840  |
| 88 | 1 | 0 | -5.151164 | 2.603058  | -0.937327 |
| 89 | 1 | 0 | -4.296610 | 5.569665  | 2.061805  |
| 90 | 1 | 0 | -3.384720 | -0.467232 | 1.841755  |
| 91 | 1 | 0 | -4.984669 | -0.367440 | 1.038889  |
| 92 | 1 | 0 | -2.781947 | -2.265291 | 0.094368  |
| 93 | 1 | 0 | -4.194256 | -3.908081 | 1.281409  |
| 94 | 1 | 0 | -3.484705 | -2.863164 | 2.302846  |
| 95 | 1 | 0 | -5.029385 | -3.617627 | -2.306399 |
| 96 | 1 | 0 | -3.522812 | -3.809612 | -1.471345 |

-----

Isomeric reductive elimination from 3-coordinate Au(III) intermediate

**CP2-iso**

SCF Done: E(RB3LYP) = -2555.58050063 A.U.; No imaginary frequency

| Center<br>Number | Atomic<br>Number | Atomic<br>Type | Coordinates (Angstroms) |           |           |
|------------------|------------------|----------------|-------------------------|-----------|-----------|
|                  |                  |                | X                       | Y         | Z         |
| 1                | 6                | 0              | 2.080124                | 2.809115  | 0.540629  |
| 2                | 6                | 0              | 1.933171                | 1.643783  | -0.200722 |
| 3                | 6                | 0              | 2.273697                | 1.539330  | -1.541049 |
| 4                | 6                | 0              | 2.737664                | 2.695760  | -2.185923 |
| 5                | 6                | 0              | 2.868163                | 3.895113  | -1.484910 |
| 6                | 6                | 0              | 2.544188                | 3.950436  | -0.127641 |
| 7                | 79               | 0              | 1.146785                | -0.018772 | 0.773573  |
| 8                | 16               | 0              | 3.337936                | -0.433450 | 1.587945  |
| 9                | 6                | 0              | 4.080731                | -1.445657 | 0.230345  |
| 10               | 6                | 0              | 5.591239                | -1.611144 | 0.439286  |
| 11               | 6                | 0              | 6.312368                | -0.272663 | 0.176521  |
| 12               | 8                | 0              | 6.058854                | 0.422972  | -0.805521 |
| 13               | 15               | 0              | -1.275168               | -0.080201 | 0.185098  |
| 14               | 6                | 0              | -2.067886               | 1.568728  | -0.389403 |
| 15               | 6                | 0              | -3.616584               | 1.494029  | -0.384477 |
| 16               | 6                | 0              | -4.213609               | 2.850047  | -0.833267 |
| 17               | 6                | 0              | -3.716039               | 3.197177  | -2.249815 |
| 18               | 6                | 0              | -2.178234               | 3.302597  | -2.238269 |
| 19               | 6                | 0              | -1.576111               | 1.943513  | -1.811551 |
| 20               | 6                | 0              | -3.780966               | 3.952970  | 0.150973  |
| 21               | 6                | 0              | -2.243573               | 4.046499  | 0.157890  |
| 22               | 6                | 0              | -1.642565               | 2.691402  | 0.597611  |
| 23               | 6                | 0              | -1.737530               | 4.401321  | -1.253178 |
| 24               | 6                | 0              | -2.016104               | -0.449380 | 1.864039  |
| 25               | 6                | 0              | -3.135925               | -1.252171 | 2.208319  |
| 26               | 6                | 0              | -3.527116               | -1.326457 | 3.555351  |
| 27               | 6                | 0              | -2.859505               | -0.642398 | 4.566867  |
| 28               | 6                | 0              | -1.762111               | 0.150122  | 4.239955  |

|    |   |   |           |           |           |
|----|---|---|-----------|-----------|-----------|
| 29 | 6 | 0 | -1.355883 | 0.237230  | 2.911269  |
| 30 | 7 | 0 | -3.883279 | -2.008216 | 1.232247  |
| 31 | 6 | 0 | -3.972786 | -3.440170 | 1.563076  |
| 32 | 6 | 0 | -1.327710 | -1.497513 | -1.106252 |
| 33 | 6 | 0 | -2.688601 | -1.670215 | -1.828784 |
| 34 | 6 | 0 | -2.607773 | -2.845638 | -2.831503 |
| 35 | 6 | 0 | -2.256463 | -4.146651 | -2.084528 |
| 36 | 6 | 0 | -0.888903 | -3.985770 | -1.391820 |
| 37 | 6 | 0 | -0.951632 | -2.817700 | -0.379295 |
| 38 | 6 | 0 | -1.528688 | -2.547344 | -3.889090 |
| 39 | 6 | 0 | -0.165161 | -2.393905 | -3.189181 |
| 40 | 6 | 0 | -0.225016 | -1.227727 | -2.174339 |
| 41 | 6 | 0 | 0.191840  | -3.696923 | -2.450616 |
| 42 | 7 | 0 | 6.077737  | -2.585042 | -0.554002 |
| 43 | 6 | 0 | -5.238234 | -1.478783 | 1.007267  |
| 44 | 7 | 0 | 7.260757  | 0.052556  | 1.086940  |
| 45 | 1 | 0 | -1.219026 | 0.696008  | 5.005134  |
| 46 | 1 | 0 | -3.194841 | -0.729283 | 5.596180  |
| 47 | 1 | 0 | -4.384577 | -1.940879 | 3.811585  |
| 48 | 1 | 0 | 0.025900  | -2.718820 | 0.113605  |
| 49 | 1 | 0 | -1.684031 | -3.039877 | 0.396736  |
| 50 | 1 | 0 | -0.638866 | -4.902073 | -0.842231 |
| 51 | 1 | 0 | 1.177145  | -3.604793 | -1.973374 |
| 52 | 1 | 0 | 0.254826  | -4.530437 | -3.162565 |
| 53 | 1 | 0 | 0.610460  | -2.159190 | -3.929091 |
| 54 | 1 | 0 | -1.779274 | -1.629990 | -4.439131 |
| 55 | 1 | 0 | -1.482602 | -3.361174 | -4.625012 |
| 56 | 1 | 0 | -3.586628 | -2.948887 | -3.316887 |
| 57 | 1 | 0 | -3.468627 | -1.856167 | -1.087988 |
| 58 | 1 | 0 | -2.949222 | -0.757181 | -2.375511 |
| 59 | 1 | 0 | -2.220044 | -4.987377 | -2.790332 |
| 60 | 1 | 0 | -3.033422 | -4.382049 | -1.345671 |
| 61 | 1 | 0 | -0.407323 | -0.291795 | -2.708974 |
| 62 | 1 | 0 | 0.753840  | -1.141008 | -1.686569 |
| 63 | 1 | 0 | -1.987876 | 2.457259  | 1.610358  |
| 64 | 1 | 0 | -0.552322 | 2.773815  | 0.630299  |
| 65 | 1 | 0 | -1.919198 | 4.811882  | 0.874272  |
| 66 | 1 | 0 | -4.216712 | 4.916154  | -0.146258 |
| 67 | 1 | 0 | -4.152827 | 3.728672  | 1.160018  |
| 68 | 1 | 0 | -5.307042 | 2.757609  | -0.834002 |
| 69 | 1 | 0 | -4.037640 | 2.428492  | -2.965803 |
| 70 | 1 | 0 | -4.156399 | 4.147595  | -2.579243 |
| 71 | 1 | 0 | -1.813232 | 3.536239  | -3.246279 |
| 72 | 1 | 0 | -1.884253 | 1.183029  | -2.535819 |
| 73 | 1 | 0 | -0.481988 | 1.998517  | -1.833353 |
| 74 | 1 | 0 | -3.973854 | 0.699529  | -1.047169 |
| 75 | 1 | 0 | -3.969139 | 1.267364  | 0.627767  |
| 76 | 1 | 0 | -2.143395 | 5.372556  | -1.566132 |
| 77 | 1 | 0 | -0.643203 | 4.493875  | -1.252079 |
| 78 | 1 | 0 | 2.180683  | 0.611205  | -2.092369 |
| 79 | 1 | 0 | 2.993378  | 2.640815  | -3.240018 |
| 80 | 1 | 0 | 2.659391  | 4.874874  | 0.430771  |
| 81 | 1 | 0 | 1.846788  | 2.849639  | 1.598294  |
| 82 | 1 | 0 | 3.232199  | 4.783189  | -1.992449 |
| 83 | 1 | 0 | 3.597596  | -2.425525 | 0.209591  |
| 84 | 1 | 0 | 3.915893  | -0.942355 | -0.724829 |
| 85 | 1 | 0 | 5.780606  | -1.928359 | 1.477745  |
| 86 | 1 | 0 | 7.084180  | -2.706107 | -0.439774 |

|    |   |   |           |           |           |
|----|---|---|-----------|-----------|-----------|
| 87 | 1 | 0 | 5.670009  | -3.495297 | -0.340885 |
| 88 | 1 | 0 | 7.795127  | 0.903018  | 0.965133  |
| 89 | 1 | 0 | 7.453359  | -0.518601 | 1.897031  |
| 90 | 1 | 0 | -4.340782 | -3.980086 | 0.684231  |
| 91 | 1 | 0 | -2.987946 | -3.833207 | 1.825711  |
| 92 | 1 | 0 | -4.660874 | -3.650300 | 2.398203  |
| 93 | 1 | 0 | -5.689764 | -2.015842 | 0.166317  |
| 94 | 1 | 0 | -5.894676 | -1.604533 | 1.884931  |
| 95 | 1 | 0 | -5.197752 | -0.419315 | 0.755863  |
| 96 | 1 | 0 | -0.499726 | 0.865772  | 2.689345  |

-----

**TS<sup>rd</sup>-iso**

SCF Done: E(RB3LYP) = -2555.57892494 A.U.; An imaginary frequency of -132.3007 cm<sup>-1</sup>

| Center<br>Number | Atomic<br>Number | Atomic<br>Type | Coordinates (Angstroms) |           |           |
|------------------|------------------|----------------|-------------------------|-----------|-----------|
|                  |                  |                | X                       | Y         | Z         |
| 1                | 6                | 0              | -3.411630               | -0.766693 | 2.193748  |
| 2                | 6                | 0              | -2.160383               | -0.189025 | 1.853021  |
| 3                | 6                | 0              | -1.449346               | 0.479208  | 2.876741  |
| 4                | 6                | 0              | -1.934382               | 0.594980  | 4.176736  |
| 5                | 6                | 0              | -3.165904               | 0.029517  | 4.498686  |
| 6                | 6                | 0              | -3.881914               | -0.640236 | 3.511408  |
| 7                | 15               | 0              | -1.302681               | -0.072115 | 0.191379  |
| 8                | 79               | 0              | 1.101990                | -0.061451 | 0.751075  |
| 9                | 16               | 0              | 3.350310                | -0.412865 | 1.431420  |
| 10               | 6                | 0              | 4.020510                | -1.466590 | 0.071741  |
| 11               | 6                | 0              | 5.485797                | -1.828331 | 0.355410  |
| 12               | 7                | 0              | 5.900971                | -2.813258 | -0.657966 |
| 13               | 7                | 0              | -4.213877               | -1.507242 | 1.248068  |
| 14               | 6                | 0              | -5.504102               | -0.866239 | 0.948424  |
| 15               | 6                | 0              | -1.444681               | -1.606958 | -0.947354 |
| 16               | 6                | 0              | -2.788637               | -1.748689 | -1.705182 |
| 17               | 6                | 0              | -2.781707               | -3.042138 | -2.553410 |
| 18               | 6                | 0              | -2.575262               | -4.266376 | -1.640147 |
| 19               | 6                | 0              | -1.222780               | -4.140015 | -0.910640 |
| 20               | 6                | 0              | -1.213095               | -2.854986 | -0.052305 |
| 21               | 6                | 0              | -0.084928               | -4.076588 | -1.946911 |
| 22               | 6                | 0              | -0.297929               | -2.849522 | -2.853058 |
| 23               | 6                | 0              | -1.644829               | -2.974661 | -3.590512 |
| 24               | 6                | 0              | -0.289616               | -1.563166 | -1.994476 |
| 25               | 6                | 0              | -1.908554               | 1.569476  | -0.587920 |
| 26               | 6                | 0              | -3.454091               | 1.653760  | -0.655588 |
| 27               | 6                | 0              | -3.886007               | 3.008718  | -1.266803 |
| 28               | 6                | 0              | -3.298239               | 3.152090  | -2.683786 |
| 29               | 6                | 0              | -1.759454               | 3.102886  | -2.605177 |
| 30               | 6                | 0              | -1.322775               | 1.742285  | -2.013202 |
| 31               | 6                | 0              | -3.377662               | 4.159066  | -0.377468 |
| 32               | 6                | 0              | -1.840067               | 4.097272  | -0.302366 |
| 33               | 6                | 0              | -1.403948               | 2.741764  | 0.300780  |
| 34               | 6                | 0              | -1.245523               | 4.249541  | -1.715033 |
| 35               | 6                | 0              | 2.288998                | 1.571042  | 0.010980  |
| 36               | 6                | 0              | 2.616349                | 1.538722  | -1.335896 |
| 37               | 6                | 0              | 3.017447                | 2.744286  | -1.930357 |
| 38               | 6                | 0              | 3.105878                | 3.913544  | -1.172946 |
| 39               | 6                | 0              | 2.795444                | 3.892427  | 0.189608  |
| 40               | 6                | 0              | 2.392066                | 2.702953  | 0.809367  |

|    |   |   |           |           |           |
|----|---|---|-----------|-----------|-----------|
| 41 | 6 | 0 | 6.378201  | -0.579657 | 0.193037  |
| 42 | 7 | 0 | 7.290233  | -0.396900 | 1.176688  |
| 43 | 8 | 0 | 6.275655  | 0.170420  | -0.775777 |
| 44 | 6 | 0 | -4.455534 | -2.894200 | 1.679804  |
| 45 | 1 | 0 | -1.347859 | 1.119002  | 4.925161  |
| 46 | 1 | 0 | -3.564510 | 0.102566  | 5.506386  |
| 47 | 1 | 0 | -4.838820 | -1.086885 | 3.764209  |
| 48 | 1 | 0 | -0.248162 | -2.773320 | 0.468658  |
| 49 | 1 | 0 | -1.986597 | -2.917029 | 0.714303  |
| 50 | 1 | 0 | -1.075695 | -5.000519 | -0.245656 |
| 51 | 1 | 0 | 0.887767  | -4.009861 | -1.440133 |
| 52 | 1 | 0 | -0.071652 | -4.993800 | -2.550610 |
| 53 | 1 | 0 | 0.520460  | -2.776970 | -3.580694 |
| 54 | 1 | 0 | -1.792658 | -2.116777 | -4.260600 |
| 55 | 1 | 0 | -1.646974 | -3.877141 | -4.216434 |
| 56 | 1 | 0 | -3.748929 | -3.121630 | -3.066149 |
| 57 | 1 | 0 | -3.609573 | -1.768306 | -0.985336 |
| 58 | 1 | 0 | -2.940677 | -0.889818 | -2.368734 |
| 59 | 1 | 0 | -2.592019 | -5.188024 | -2.237402 |
| 60 | 1 | 0 | -3.394305 | -4.341114 | -0.913316 |
| 61 | 1 | 0 | -0.381329 | -0.691966 | -2.647974 |
| 62 | 1 | 0 | 0.680308  | -1.482399 | -1.487734 |
| 63 | 1 | 0 | -1.808986 | 2.650113  | 1.315238  |
| 64 | 1 | 0 | -0.312367 | 2.714860  | 0.380539  |
| 65 | 1 | 0 | -1.465962 | 4.897968  | 0.348373  |
| 66 | 1 | 0 | -3.696185 | 5.125038  | -0.791702 |
| 67 | 1 | 0 | -3.810794 | 4.080567  | 0.628954  |
| 68 | 1 | 0 | -4.982247 | 3.029957  | -1.314041 |
| 69 | 1 | 0 | -3.670371 | 2.347573  | -3.332743 |
| 70 | 1 | 0 | -3.622856 | 4.101521  | -3.129936 |
| 71 | 1 | 0 | -1.332215 | 3.191562  | -3.612075 |
| 72 | 1 | 0 | -1.681139 | 0.946534  | -2.673674 |
| 73 | 1 | 0 | -0.228163 | 1.682770  | -1.985886 |
| 74 | 1 | 0 | -3.866713 | 0.833596  | -1.252436 |
| 75 | 1 | 0 | -3.866036 | 1.568372  | 0.355374  |
| 76 | 1 | 0 | -1.536141 | 5.218180  | -2.143338 |
| 77 | 1 | 0 | -0.148344 | 4.233015  | -1.669757 |
| 78 | 1 | 0 | 2.549860  | 0.631578  | -1.926035 |
| 79 | 1 | 0 | 3.258435  | 2.752264  | -2.989312 |
| 80 | 1 | 0 | 2.875407  | 4.795424  | 0.787793  |
| 81 | 1 | 0 | 2.170318  | 2.678114  | 1.870044  |
| 82 | 1 | 0 | 3.428392  | 4.838678  | -1.640685 |
| 83 | 1 | 0 | 3.417541  | -2.372984 | -0.013203 |
| 84 | 1 | 0 | 3.978610  | -0.911198 | -0.868204 |
| 85 | 1 | 0 | 5.573685  | -2.209994 | 1.385542  |
| 86 | 1 | 0 | 6.879044  | -3.059238 | -0.504038 |
| 87 | 1 | 0 | 5.378004  | -3.675307 | -0.504817 |
| 88 | 1 | 0 | 7.929701  | 0.385205  | 1.120707  |
| 89 | 1 | 0 | 7.365306  | -1.016086 | 1.970677  |
| 90 | 1 | 0 | -4.873460 | -3.456791 | 0.838188  |
| 91 | 1 | 0 | -3.520219 | -3.368788 | 1.984521  |
| 92 | 1 | 0 | -5.165340 | -2.967594 | 2.520473  |
| 93 | 1 | 0 | -5.983575 | -1.412214 | 0.128899  |
| 94 | 1 | 0 | -6.194455 | -0.869964 | 1.808840  |
| 95 | 1 | 0 | -5.354638 | 0.165679  | 0.631877  |
| 96 | 1 | 0 | -0.487637 | 0.929394  | 2.654519  |



## CP3-iso

SCF Done: E(RB3LYP) = -2555.65070232 A.U.; No imaginary frequency

| Center<br>Number | Atomic<br>Number | Atomic<br>Type | Coordinates (Angstroms) |           |           |
|------------------|------------------|----------------|-------------------------|-----------|-----------|
|                  |                  |                | X                       | Y         | Z         |
| 1                | 6                | 0              | 4.904285                | 1.755456  | 1.253187  |
| 2                | 6                | 0              | 3.997070                | 1.066483  | 0.441866  |
| 3                | 6                | 0              | 3.681806                | 1.534842  | -0.839715 |
| 4                | 6                | 0              | 4.292350                | 2.696732  | -1.311576 |
| 5                | 6                | 0              | 5.198574                | 3.393810  | -0.505453 |
| 6                | 6                | 0              | 5.501257                | 2.925134  | 0.773955  |
| 7                | 79               | 0              | 0.818104                | -0.150576 | 0.666066  |
| 8                | 16               | 0              | 3.217523                | -0.408076 | 1.132564  |
| 9                | 6                | 0              | 3.732368                | -1.785801 | 0.005424  |
| 10               | 6                | 0              | 5.105279                | -2.382524 | 0.346918  |
| 11               | 6                | 0              | 6.237626                | -1.442593 | -0.115396 |
| 12               | 8                | 0              | 6.271473                | -0.987059 | -1.256240 |
| 13               | 15               | 0              | -1.502710               | 0.042739  | 0.202072  |
| 14               | 6                | 0              | -1.711647               | 1.634891  | -0.835696 |
| 15               | 6                | 0              | -3.187012               | 2.050838  | -1.049614 |
| 16               | 6                | 0              | -3.257886               | 3.359546  | -1.873267 |
| 17               | 6                | 0              | -2.572101               | 3.159062  | -3.238917 |
| 18               | 6                | 0              | -1.094481               | 2.780593  | -3.016366 |
| 19               | 6                | 0              | -1.025470               | 1.460487  | -2.215277 |
| 20               | 6                | 0              | -2.548423               | 4.488498  | -1.101599 |
| 21               | 6                | 0              | -1.074006               | 4.099999  | -0.880341 |
| 22               | 6                | 0              | -0.997451               | 2.787124  | -0.069380 |
| 23               | 6                | 0              | -0.378971               | 3.902790  | -2.241096 |
| 24               | 6                | 0              | -2.395414               | 0.345573  | 1.821128  |
| 25               | 6                | 0              | -3.775538               | 0.205969  | 2.128237  |
| 26               | 6                | 0              | -4.236540               | 0.614047  | 3.390515  |
| 27               | 6                | 0              | -3.389250               | 1.146450  | 4.357655  |
| 28               | 6                | 0              | -2.032024               | 1.273412  | 4.072725  |
| 29               | 6                | 0              | -1.554992               | 0.874238  | 2.826778  |
| 30               | 7                | 0              | -4.725760               | -0.376346 | 1.207735  |
| 31               | 6                | 0              | -5.296493               | -1.632114 | 1.723332  |
| 32               | 6                | 0              | -1.939722               | -1.591453 | -0.695873 |
| 33               | 6                | 0              | -3.278314               | -1.579937 | -1.475385 |
| 34               | 6                | 0              | -3.534515               | -2.970205 | -2.103186 |
| 35               | 6                | 0              | -3.580855               | -4.045225 | -0.998787 |
| 36               | 6                | 0              | -2.231390               | -4.077670 | -0.253592 |
| 37               | 6                | 0              | -1.960269               | -2.700164 | 0.392211  |
| 38               | 6                | 0              | -2.405343               | -3.302264 | -3.096848 |
| 39               | 6                | 0              | -1.062549               | -3.328016 | -2.341958 |
| 40               | 6                | 0              | -0.797008               | -1.947659 | -1.696368 |
| 41               | 6                | 0              | -1.102618               | -4.410576 | -1.247700 |
| 42               | 7                | 0              | 5.221078                | -3.632656 | -0.421235 |
| 43               | 6                | 0              | -5.825672               | 0.527891  | 0.837312  |
| 44               | 7                | 0              | 7.184522                | -1.186678 | 0.816959  |
| 45               | 1                | 0              | -1.342570               | 1.675394  | 4.808948  |
| 46               | 1                | 0              | -3.785490               | 1.448481  | 5.322897  |
| 47               | 1                | 0              | -5.292567               | 0.502364  | 3.617429  |
| 48               | 1                | 0              | -0.995166               | -2.721787 | 0.917431  |
| 49               | 1                | 0              | -2.725837               | -2.487350 | 1.141787  |
| 50               | 1                | 0              | -2.263422               | -4.832895 | 0.542093  |
| 51               | 1                | 0              | -0.137565               | -4.458050 | -0.724612 |
| 52               | 1                | 0              | -1.274256               | -5.397421 | -1.698137 |

|    |   |   |           |           |           |
|----|---|---|-----------|-----------|-----------|
| 53 | 1 | 0 | -0.244845 | -3.537511 | -3.043541 |
| 54 | 1 | 0 | -2.374645 | -2.553659 | -3.900379 |
| 55 | 1 | 0 | -2.588341 | -4.276413 | -3.570148 |
| 56 | 1 | 0 | -4.497100 | -2.938821 | -2.629813 |
| 57 | 1 | 0 | -4.092650 | -1.300065 | -0.803936 |
| 58 | 1 | 0 | -3.236576 | -0.830136 | -2.274618 |
| 59 | 1 | 0 | -3.785520 | -5.029066 | -1.442309 |
| 60 | 1 | 0 | -4.398079 | -3.834428 | -0.297093 |
| 61 | 1 | 0 | -0.714368 | -1.193315 | -2.482771 |
| 62 | 1 | 0 | 0.169118  | -1.975639 | -1.176454 |
| 63 | 1 | 0 | -1.463348 | 2.934118  | 0.912221  |
| 64 | 1 | 0 | 0.054579  | 2.528318  | 0.107516  |
| 65 | 1 | 0 | -0.562712 | 4.886693  | -0.310878 |
| 66 | 1 | 0 | -2.609638 | 5.428710  | -1.666055 |
| 67 | 1 | 0 | -3.044685 | 4.659024  | -0.136518 |
| 68 | 1 | 0 | -4.314656 | 3.616169  | -2.021224 |
| 69 | 1 | 0 | -3.082600 | 2.370702  | -3.808854 |
| 70 | 1 | 0 | -2.640786 | 4.080746  | -3.831962 |
| 71 | 1 | 0 | -0.601195 | 2.622076  | -3.983769 |
| 72 | 1 | 0 | -1.526737 | 0.677028  | -2.792968 |
| 73 | 1 | 0 | 0.020943  | 1.155291  | -2.084424 |
| 74 | 1 | 0 | -3.749346 | 1.260953  | -1.558431 |
| 75 | 1 | 0 | -3.658494 | 2.217683  | -0.076214 |
| 76 | 1 | 0 | -0.406298 | 4.836544  | -2.818413 |
| 77 | 1 | 0 | 0.678999  | 3.646391  | -2.092453 |
| 78 | 1 | 0 | 2.968623  | 1.001474  | -1.460388 |
| 79 | 1 | 0 | 4.053265  | 3.061108  | -2.306297 |
| 80 | 1 | 0 | 6.204872  | 3.463181  | 1.402101  |
| 81 | 1 | 0 | 5.144579  | 1.382271  | 2.243604  |
| 82 | 1 | 0 | 5.665706  | 4.301642  | -0.875628 |
| 83 | 1 | 0 | 2.954991  | -2.542791 | 0.138678  |
| 84 | 1 | 0 | 3.712941  | -1.433446 | -1.027017 |
| 85 | 1 | 0 | 5.169236  | -2.533390 | 1.435542  |
| 86 | 1 | 0 | 6.161412  | -4.012295 | -0.313122 |
| 87 | 1 | 0 | 4.596263  | -4.326078 | -0.010862 |
| 88 | 1 | 0 | 7.969926  | -0.596119 | 0.575772  |
| 89 | 1 | 0 | 7.149126  | -1.573831 | 1.748830  |
| 90 | 1 | 0 | -5.851581 | -2.125522 | 0.918290  |
| 91 | 1 | 0 | -4.504715 | -2.303222 | 2.060755  |
| 92 | 1 | 0 | -5.990200 | -1.472508 | 2.565625  |
| 93 | 1 | 0 | -6.391478 | 0.069914  | 0.018920  |
| 94 | 1 | 0 | -6.526207 | 0.718062  | 1.667817  |
| 95 | 1 | 0 | -5.435853 | 1.484961  | 0.491484  |
| 96 | 1 | 0 | -0.493638 | 0.980319  | 2.628798  |

-----

**CP2-cis**

SCF Done: E(RB3LYP) = -2555.61288320 A.U.; No imaginary frequency

| Center<br>Number | Atomic<br>Number | Atomic<br>Type | Coordinates (Angstroms) |           |          |
|------------------|------------------|----------------|-------------------------|-----------|----------|
|                  |                  |                | X                       | Y         | Z        |
| 1                | 6                | 0              | 4.122241                | -0.940336 | 3.728543 |
| 2                | 6                | 0              | 4.101549                | 0.524880  | 3.249782 |
| 3                | 6                | 0              | 3.150308                | 1.348916  | 4.137773 |
| 4                | 6                | 0              | 1.731739                | 0.754816  | 4.048581 |
| 5                | 6                | 0              | 1.748263                | -0.706000 | 4.536978 |
| 6                | 6                | 0              | 2.698906                | -1.525434 | 3.643904 |

|    |    |   |           |           |           |
|----|----|---|-----------|-----------|-----------|
| 7  | 6  | 0 | 3.618559  | 0.585627  | 1.780476  |
| 8  | 6  | 0 | 2.191097  | -0.010535 | 1.666164  |
| 9  | 6  | 0 | 1.234951  | 0.800003  | 2.585525  |
| 10 | 6  | 0 | 2.211663  | -1.479198 | 2.177647  |
| 11 | 15 | 0 | 1.477855  | -0.044891 | -0.110557 |
| 12 | 6  | 0 | 1.762389  | 1.521621  | -1.168937 |
| 13 | 6  | 0 | 3.230704  | 1.750408  | -1.616367 |
| 14 | 6  | 0 | 3.324097  | 3.018895  | -2.498197 |
| 15 | 6  | 0 | 2.830098  | 4.246781  | -1.709600 |
| 16 | 6  | 0 | 1.363696  | 4.025418  | -1.291986 |
| 17 | 6  | 0 | 1.271965  | 2.772443  | -0.391488 |
| 18 | 6  | 0 | 2.458514  | 2.830264  | -3.758690 |
| 19 | 6  | 0 | 0.993388  | 2.609586  | -3.337004 |
| 20 | 6  | 0 | 0.890520  | 1.350246  | -2.447223 |
| 21 | 6  | 0 | 0.490019  | 3.833704  | -2.547602 |
| 22 | 79 | 0 | -0.873651 | -0.840674 | -0.225399 |
| 23 | 7  | 0 | 0.075870  | -2.607918 | -1.325624 |
| 24 | 6  | 0 | -0.566925 | -2.652891 | -2.677892 |
| 25 | 6  | 0 | -2.795271 | -1.652453 | -0.315161 |
| 26 | 6  | 0 | -3.261531 | -2.396335 | 0.773912  |
| 27 | 6  | 0 | -4.513208 | -3.020397 | 0.712448  |
| 28 | 6  | 0 | -5.310380 | -2.887144 | -0.427140 |
| 29 | 6  | 0 | -4.854262 | -2.126494 | -1.505644 |
| 30 | 6  | 0 | -3.600801 | -1.503663 | -1.448665 |
| 31 | 16 | 0 | -1.883081 | 1.010699  | 0.908524  |
| 32 | 6  | 0 | -3.207306 | 1.639510  | -0.210785 |
| 33 | 6  | 0 | -3.911381 | 2.833001  | 0.455335  |
| 34 | 6  | 0 | -4.752953 | 2.344729  | 1.652500  |
| 35 | 8  | 0 | -5.568910 | 1.430905  | 1.545911  |
| 36 | 7  | 0 | -4.828925 | 3.418749  | -0.537366 |
| 37 | 6  | 0 | 2.303271  | -1.439212 | -0.984940 |
| 38 | 6  | 0 | 1.549960  | -2.520277 | -1.476671 |
| 39 | 6  | 0 | 2.193522  | -3.578858 | -2.132879 |
| 40 | 6  | 0 | 3.575185  | -3.585635 | -2.297889 |
| 41 | 6  | 0 | 4.337118  | -2.528616 | -1.802616 |
| 42 | 6  | 0 | 3.702308  | -1.472900 | -1.156427 |
| 43 | 6  | 0 | -0.279251 | -3.839055 | -0.548991 |
| 44 | 7  | 0 | -4.535827 | 3.008364  | 2.813492  |
| 45 | 1  | 0 | 1.621438  | -4.413908 | -2.519627 |
| 46 | 1  | 0 | 4.048898  | -4.418311 | -2.808280 |
| 47 | 1  | 0 | 5.416424  | -2.522305 | -1.916580 |
| 48 | 1  | 0 | 4.308947  | -0.661481 | -0.777264 |
| 49 | 1  | 0 | 1.205013  | -1.913911 | 2.111049  |
| 50 | 1  | 0 | 2.873380  | -2.092780 | 1.556964  |
| 51 | 1  | 0 | 2.707538  | -2.573224 | 3.969813  |
| 52 | 1  | 0 | 0.208947  | -3.797415 | 0.425602  |
| 53 | 1  | 0 | 0.045591  | -4.737196 | -1.081716 |
| 54 | 1  | 0 | -1.359794 | -3.870664 | -0.417215 |
| 55 | 1  | 0 | 0.734912  | -1.128978 | 4.501398  |
| 56 | 1  | 0 | 2.080082  | -0.752506 | 5.582729  |
| 57 | 1  | 0 | 1.041011  | 1.345770  | 4.663353  |
| 58 | 1  | 0 | 3.143876  | 2.398854  | 3.814835  |
| 59 | 1  | 0 | 3.499734  | 1.335081  | 5.178799  |
| 60 | 1  | 0 | 5.113754  | 0.946072  | 3.294944  |
| 61 | 1  | 0 | 4.324035  | 0.031132  | 1.153463  |
| 62 | 1  | 0 | 3.626903  | 1.627689  | 1.442296  |
| 63 | 1  | 0 | 4.489030  | -0.991967 | 4.762267  |
| 64 | 1  | 0 | 4.812877  | -1.531320 | 3.111789  |

|    |   |   |           |           |           |
|----|---|---|-----------|-----------|-----------|
| 65 | 1 | 0 | 1.164014  | 1.841148  | 2.255100  |
| 66 | 1 | 0 | 0.226415  | 0.375523  | 2.537315  |
| 67 | 1 | 0 | 1.221847  | 0.470269  | -3.013643 |
| 68 | 1 | 0 | -0.159290 | 1.187601  | -2.172343 |
| 69 | 1 | 0 | 0.367960  | 2.455910  | -4.225543 |
| 70 | 1 | 0 | -1.646249 | -2.721926 | -2.550989 |
| 71 | 1 | 0 | -0.217466 | -3.522509 | -3.241834 |
| 72 | 1 | 0 | -0.317035 | -1.740812 | -3.221883 |
| 73 | 1 | 0 | 2.534545  | 3.714566  | -4.405410 |
| 74 | 1 | 0 | 2.819067  | 1.972313  | -4.342402 |
| 75 | 1 | 0 | 4.374080  | 3.158032  | -2.785311 |
| 76 | 1 | 0 | 3.457270  | 4.404952  | -0.821630 |
| 77 | 1 | 0 | 2.915805  | 5.149760  | -2.328824 |
| 78 | 1 | 0 | 1.004910  | 4.889088  | -0.717873 |
| 79 | 1 | 0 | 1.893670  | 2.930521  | 0.497009  |
| 80 | 1 | 0 | 0.241548  | 2.625057  | -0.049737 |
| 81 | 1 | 0 | 3.891246  | 1.862850  | -0.749532 |
| 82 | 1 | 0 | 3.589174  | 0.894285  | -2.196266 |
| 83 | 1 | 0 | 0.534981  | 4.731784  | -3.178020 |
| 84 | 1 | 0 | -0.561304 | 3.693721  | -2.261064 |
| 85 | 1 | 0 | -2.657723 | -2.499168 | 1.671734  |
| 86 | 1 | 0 | -4.863956 | -3.603524 | 1.560147  |
| 87 | 1 | 0 | -5.470892 | -2.010012 | -2.393140 |
| 88 | 1 | 0 | -3.266722 | -0.903762 | -2.291354 |
| 89 | 1 | 0 | -6.284098 | -3.367122 | -0.470847 |
| 90 | 1 | 0 | -3.153636 | 3.549735  | 0.810743  |
| 91 | 1 | 0 | -5.320387 | 4.206299  | -0.114131 |
| 92 | 1 | 0 | -4.272181 | 3.821545  | -1.290864 |
| 93 | 1 | 0 | -5.062234 | 2.750178  | 3.638103  |
| 94 | 1 | 0 | -3.866476 | 3.760103  | 2.892795  |
| 95 | 1 | 0 | -2.757401 | 1.963041  | -1.153913 |
| 96 | 1 | 0 | -3.945288 | 0.863199  | -0.407985 |

-----

**TS<sup>rd</sup>-cis**

SCF Done: E(RB3LYP) = -2555.59679983 A.U.; An imaginary frequency of -226.0526 cm<sup>-1</sup>

| Center<br>Number | Atomic<br>Number | Atomic<br>Type | Coordinates (Angstroms) |           |           |
|------------------|------------------|----------------|-------------------------|-----------|-----------|
|                  |                  |                | X                       | Y         | Z         |
| 1                | 6                | 0              | -2.097307               | 3.127965  | -3.622887 |
| 2                | 6                | 0              | -2.972557               | 3.260242  | -2.361742 |
| 3                | 6                | 0              | -2.413650               | 4.374323  | -1.455455 |
| 4                | 6                | 0              | -0.971706               | 4.019322  | -1.045316 |
| 5                | 6                | 0              | -0.090839               | 3.884342  | -2.302310 |
| 6                | 6                | 0              | -0.657377               | 2.772089  | -3.205052 |
| 7                | 6                | 0              | -2.978606               | 1.913469  | -1.599669 |
| 8                | 6                | 0              | -1.538711               | 1.546200  | -1.154816 |
| 9                | 6                | 0              | -0.975080               | 2.685191  | -0.265116 |
| 10               | 6                | 0              | -0.655729               | 1.434021  | -2.431540 |
| 11               | 15               | 0              | -1.360231               | -0.112640 | -0.228183 |
| 12               | 6                | 0              | -2.220610               | -0.218915 | 1.480089  |
| 13               | 6                | 0              | -3.637429               | 0.403922  | 1.570930  |
| 14               | 6                | 0              | -4.213504               | 0.209773  | 2.994780  |
| 15               | 6                | 0              | -3.301703               | 0.911993  | 4.018959  |
| 16               | 6                | 0              | -1.892540               | 0.291903  | 3.953248  |
| 17               | 6                | 0              | -1.309458               | 0.474057  | 2.533768  |
| 18               | 6                | 0              | -4.296978               | -1.294071 | 3.322566  |

|    |    |   |           |           |           |
|----|----|---|-----------|-----------|-----------|
| 19 | 6  | 0 | -2.884471 | -1.908387 | 3.262468  |
| 20 | 6  | 0 | -2.309872 | -1.729594 | 1.839975  |
| 21 | 6  | 0 | -1.970314 | -1.209981 | 4.286944  |
| 22 | 79 | 0 | 0.983000  | -0.816130 | -0.035862 |
| 23 | 7  | 0 | 0.092236  | -2.550454 | -1.633898 |
| 24 | 6  | 0 | 0.427837  | -3.855510 | -1.016016 |
| 25 | 6  | 0 | 2.962955  | -1.617907 | 0.208447  |
| 26 | 6  | 0 | 3.800870  | -1.572376 | -0.915067 |
| 27 | 6  | 0 | 4.733263  | -2.597504 | -1.114886 |
| 28 | 6  | 0 | 4.839907  | -3.646397 | -0.199778 |
| 29 | 6  | 0 | 4.005527  | -3.677956 | 0.924834  |
| 30 | 6  | 0 | 3.075986  | -2.661802 | 1.143299  |
| 31 | 16 | 0 | 2.636413  | 0.398035  | 1.340272  |
| 32 | 6  | 0 | 3.579316  | 1.474275  | 0.182035  |
| 33 | 6  | 0 | 4.106901  | 2.705220  | 0.941255  |
| 34 | 6  | 0 | 2.940684  | 3.647206  | 1.301592  |
| 35 | 8  | 0 | 2.178804  | 4.092585  | 0.444667  |
| 36 | 7  | 0 | 5.012325  | 3.421757  | 0.029194  |
| 37 | 6  | 0 | -2.125768 | -1.397802 | -1.304638 |
| 38 | 6  | 0 | -1.346624 | -2.429483 | -1.873672 |
| 39 | 6  | 0 | -1.958970 | -3.385200 | -2.698227 |
| 40 | 6  | 0 | -3.326198 | -3.349010 | -2.956146 |
| 41 | 6  | 0 | -4.109282 | -2.345680 | -2.386259 |
| 42 | 6  | 0 | -3.509265 | -1.386398 | -1.575404 |
| 43 | 6  | 0 | 0.864229  | -2.347287 | -2.882827 |
| 44 | 7  | 0 | 2.830827  | 3.948563  | 2.616756  |
| 45 | 1  | 0 | -1.360214 | -4.172770 | -3.143783 |
| 46 | 1  | 0 | -3.774034 | -4.103325 | -3.596168 |
| 47 | 1  | 0 | -5.178429 | -2.305714 | -2.570442 |
| 48 | 1  | 0 | -4.132815 | -0.614588 | -1.143212 |
| 49 | 1  | 0 | 0.375523  | 1.176932  | -2.155382 |
| 50 | 1  | 0 | -1.031521 | 0.632725  | -3.080778 |
| 51 | 1  | 0 | -0.028016 | 2.656468  | -4.096951 |
| 52 | 1  | 0 | 0.623287  | -1.369467 | -3.304739 |
| 53 | 1  | 0 | 0.642257  | -3.124085 | -3.626485 |
| 54 | 1  | 0 | 1.929877  | -2.383645 | -2.646065 |
| 55 | 1  | 0 | 0.940719  | 3.656817  | -2.006439 |
| 56 | 1  | 0 | -0.069013 | 4.836574  | -2.850089 |
| 57 | 1  | 0 | -0.559430 | 4.795036  | -0.389529 |
| 58 | 1  | 0 | -3.045462 | 4.489502  | -0.563717 |
| 59 | 1  | 0 | -2.431064 | 5.335213  | -1.987513 |
| 60 | 1  | 0 | -4.005221 | 3.496306  | -2.649321 |
| 61 | 1  | 0 | -3.379402 | 1.137815  | -2.260397 |
| 62 | 1  | 0 | -3.647803 | 1.988687  | -0.736443 |
| 63 | 1  | 0 | -2.102742 | 4.070053  | -4.187571 |
| 64 | 1  | 0 | -2.503945 | 2.352163  | -4.286117 |
| 65 | 1  | 0 | -1.591732 | 2.803080  | 0.633429  |
| 66 | 1  | 0 | 0.044583  | 2.450037  | 0.062034  |
| 67 | 1  | 0 | -2.949189 | -2.254215 | 1.121467  |
| 68 | 1  | 0 | -1.313635 | -2.189926 | 1.782917  |
| 69 | 1  | 0 | -2.937216 | -2.982608 | 3.481336  |
| 70 | 1  | 0 | 1.489042  | -3.862216 | -0.760700 |
| 71 | 1  | 0 | 0.225103  | -4.693874 | -1.694694 |
| 72 | 1  | 0 | -0.158626 | -3.983781 | -0.103700 |
| 73 | 1  | 0 | -4.727709 | -1.437038 | 4.322632  |
| 74 | 1  | 0 | -4.961155 | -1.801856 | 2.609922  |
| 75 | 1  | 0 | -5.216867 | 0.653444  | 3.023101  |
| 76 | 1  | 0 | -3.252291 | 1.988819  | 3.807002  |

|    |   |   |           |           |           |
|----|---|---|-----------|-----------|-----------|
| 77 | 1 | 0 | -3.715789 | 0.801928  | 5.030241  |
| 78 | 1 | 0 | -1.229498 | 0.798392  | 4.666369  |
| 79 | 1 | 0 | -1.210919 | 1.542800  | 2.315267  |
| 80 | 1 | 0 | -0.301258 | 0.045278  | 2.494592  |
| 81 | 1 | 0 | -3.598120 | 1.475666  | 1.346357  |
| 82 | 1 | 0 | -4.315909 | -0.059555 | 0.846877  |
| 83 | 1 | 0 | -2.363838 | -1.352578 | 5.302399  |
| 84 | 1 | 0 | -0.966383 | -1.656229 | 4.265764  |
| 85 | 1 | 0 | 3.725219  | -0.765434 | -1.636965 |
| 86 | 1 | 0 | 5.372443  | -2.569147 | -1.993047 |
| 87 | 1 | 0 | 4.087318  | -4.488560 | 1.643696  |
| 88 | 1 | 0 | 2.455922  | -2.672036 | 2.034577  |
| 89 | 1 | 0 | 5.573081  | -4.432163 | -0.355027 |
| 90 | 1 | 0 | 4.604919  | 2.371068  | 1.865646  |
| 91 | 1 | 0 | 5.337502  | 4.276195  | 0.481728  |
| 92 | 1 | 0 | 5.847180  | 2.853156  | -0.110291 |
| 93 | 1 | 0 | 2.095571  | 4.573325  | 2.921722  |
| 94 | 1 | 0 | 3.472403  | 3.594104  | 3.311129  |
| 95 | 1 | 0 | 4.422893  | 0.903925  | -0.217257 |
| 96 | 1 | 0 | 2.942523  | 1.809389  | -0.637757 |

**Prod**

SCF Done: E(RB3LYP) = -933.114169000 A.U.; No imaginary frequency

| Center<br>Number | Atomic<br>Number | Atomic<br>Type | Coordinates (Angstroms) |           |           |
|------------------|------------------|----------------|-------------------------|-----------|-----------|
|                  |                  |                | X                       | Y         | Z         |
| 1                | 6                | 0              | 2.671547                | 1.243662  | -0.306227 |
| 2                | 6                | 0              | 1.696337                | 0.234064  | -0.236514 |
| 3                | 6                | 0              | 2.068758                | -1.053082 | 0.173198  |
| 4                | 6                | 0              | 3.399160                | -1.319088 | 0.511697  |
| 5                | 6                | 0              | 4.367130                | -0.317269 | 0.442049  |
| 6                | 6                | 0              | 3.995033                | 0.965976  | 0.029331  |
| 7                | 16               | 0              | 0.034976                | 0.701093  | -0.706924 |
| 8                | 6                | 0              | -0.957439               | -0.803649 | -0.356450 |
| 9                | 6                | 0              | -2.446836               | -0.497900 | -0.554232 |
| 10               | 7                | 0              | -3.181183               | -1.772538 | -0.466611 |
| 11               | 6                | 0              | -2.954840               | 0.413892  | 0.583262  |
| 12               | 7                | 0              | -3.736881               | 1.444119  | 0.182996  |
| 13               | 8                | 0              | -2.683426               | 0.195398  | 1.762120  |
| 14               | 1                | 0              | 1.338959                | -1.852574 | 0.231821  |
| 15               | 1                | 0              | 3.673066                | -2.321602 | 0.829589  |
| 16               | 1                | 0              | 4.736903                | 1.757852  | -0.029429 |
| 17               | 1                | 0              | 2.392546                | 2.245995  | -0.621347 |
| 18               | 1                | 0              | 5.398809                | -0.531239 | 0.705659  |
| 19               | 1                | 0              | -0.651775               | -1.605709 | -1.034762 |
| 20               | 1                | 0              | -0.802014               | -1.118962 | 0.677628  |
| 21               | 1                | 0              | -2.588316               | 0.012335  | -1.520841 |
| 22               | 1                | 0              | -4.178650               | -1.590902 | -0.580399 |
| 23               | 1                | 0              | -2.920312               | -2.350326 | -1.265643 |
| 24               | 1                | 0              | -4.135974               | 2.062387  | 0.877214  |
| 25               | 1                | 0              | -3.962105               | 1.611375  | -0.787048 |

**LAu(I)-SbF<sub>6</sub>**

SCF Done: E(RB3LYP) = -2227.29357958 A.U.; No imaginary frequency

| Center<br>Number | Atomic<br>Number | Atomic<br>Type | Coordinates (Angstroms) |           |           |
|------------------|------------------|----------------|-------------------------|-----------|-----------|
|                  |                  |                | X                       | Y         | Z         |
| 1                | 6                | 0              | -0.960406               | 4.138833  | -0.499894 |
| 2                | 6                | 0              | -0.079957               | 4.061412  | 0.761682  |
| 3                | 6                | 0              | 1.187306                | 4.917649  | 0.568215  |
| 4                | 6                | 0              | 1.978284                | 4.391923  | -0.645467 |
| 5                | 6                | 0              | 1.103238                | 4.476712  | -1.909272 |
| 6                | 6                | 0              | -0.159357               | 3.616788  | -1.707682 |
| 7                | 6                | 0              | 0.325430                | 2.593273  | 1.019936  |
| 8                | 6                | 0              | 1.138153                | 2.040837  | -0.187357 |
| 9                | 6                | 0              | 2.396662                | 2.922440  | -0.397201 |
| 10               | 6                | 0              | 0.246631                | 2.146497  | -1.459211 |
| 11               | 15               | 0              | 1.483635                | 0.195220  | 0.201354  |
| 12               | 6                | 0              | 2.731005                | -0.717765 | -0.920153 |
| 13               | 6                | 0              | 2.246615                | -0.639365 | -2.392889 |
| 14               | 6                | 0              | 3.153112                | -1.502519 | -3.298952 |
| 15               | 6                | 0              | 3.117118                | -2.970140 | -2.830857 |
| 16               | 6                | 0              | 3.629452                | -3.054439 | -1.379869 |
| 17               | 6                | 0              | 2.716975                | -2.207080 | -0.465674 |
| 18               | 6                | 0              | 4.596855                | -0.968417 | -3.227053 |
| 19               | 6                | 0              | 5.099120                | -1.057228 | -1.773597 |
| 20               | 6                | 0              | 4.195298                | -0.207694 | -0.846878 |
| 21               | 6                | 0              | 5.074441                | -2.525135 | -1.306714 |
| 22               | 6                | 0              | 2.140202                | 0.105626  | 1.929483  |
| 23               | 6                | 0              | 1.484715                | -0.584435 | 2.981128  |
| 24               | 6                | 0              | 2.068388                | -0.595187 | 4.257694  |
| 25               | 6                | 0              | 3.267618                | 0.059987  | 4.522892  |
| 26               | 6                | 0              | 3.912556                | 0.749330  | 3.496880  |
| 27               | 6                | 0              | 3.351615                | 0.766716  | 2.222236  |
| 28               | 7                | 0              | 0.231787                | -1.270075 | 2.781320  |
| 29               | 6                | 0              | 0.342074                | -2.725669 | 2.936221  |
| 30               | 79               | 0              | -0.545376               | -0.859940 | 0.068998  |
| 31               | 9                | 0              | -2.613458               | -1.742558 | -0.074447 |
| 32               | 6                | 0              | -0.864569               | -0.711670 | 3.582830  |
| 33               | 1                | 0              | 1.564736                | -1.129093 | 5.058192  |
| 34               | 1                | 0              | 3.692068                | 0.033663  | 5.522398  |
| 35               | 1                | 0              | 4.846107                | 1.272267  | 3.680805  |
| 36               | 1                | 0              | 3.873275                | 1.309743  | 1.445684  |
| 37               | 1                | 0              | -0.575194               | 1.983775  | 1.171833  |
| 38               | 1                | 0              | 0.920457                | 2.534480  | 1.938334  |
| 39               | 1                | 0              | -0.642993               | 4.421452  | 1.632307  |
| 40               | 1                | 0              | -0.932420               | 0.365723  | 3.409467  |
| 41               | 1                | 0              | -0.748541               | -0.887031 | 4.665477  |
| 42               | 1                | 0              | -1.803981               | -1.172802 | 3.260313  |
| 43               | 1                | 0              | -1.869246               | 3.537274  | -0.361689 |
| 44               | 1                | 0              | -1.279613               | 5.174858  | -0.675820 |
| 45               | 1                | 0              | -0.782190               | 3.651730  | -2.610776 |
| 46               | 1                | 0              | 1.665825                | 4.125157  | -2.784986 |
| 47               | 1                | 0              | 0.822861                | 5.520583  | -2.104027 |
| 48               | 1                | 0              | 2.889482                | 4.988138  | -0.781856 |
| 49               | 1                | 0              | 3.049180                | 2.888688  | 0.480747  |
| 50               | 1                | 0              | 2.975745                | 2.562676  | -1.255208 |
| 51               | 1                | 0              | 0.911647                | 5.968771  | 0.409383  |
| 52               | 1                | 0              | 1.810590                | 4.881015  | 1.472156  |
| 53               | 1                | 0              | 0.779724                | 1.766362  | -2.336843 |
| 54               | 1                | 0              | -0.655615               | 1.535557  | -1.340579 |
| 55               | 1                | 0              | 3.057669                | -2.284905 | 0.574469  |

|    |    |   |           |           |           |
|----|----|---|-----------|-----------|-----------|
| 56 | 1  | 0 | 1.694074  | -2.603990 | -0.503396 |
| 57 | 1  | 0 | 3.595023  | -4.094780 | -1.032191 |
| 58 | 1  | 0 | -0.609776 | -3.183429 | 2.647064  |
| 59 | 1  | 0 | 0.573728  | -3.037221 | 3.968740  |
| 60 | 1  | 0 | 1.123904  | -3.106845 | 2.273825  |
| 61 | 1  | 0 | 5.731735  | -3.134154 | -1.941571 |
| 62 | 1  | 0 | 5.455447  | -2.602949 | -0.279352 |
| 63 | 1  | 0 | 6.120959  | -0.662576 | -1.707548 |
| 64 | 1  | 0 | 4.633693  | 0.071491  | -3.579444 |
| 65 | 1  | 0 | 5.250257  | -1.554873 | -3.886694 |
| 66 | 1  | 0 | 2.780194  | -1.430646 | -4.328506 |
| 67 | 1  | 0 | 2.278721  | 0.397067  | -2.747216 |
| 68 | 1  | 0 | 1.204881  | -0.978448 | -2.466112 |
| 69 | 1  | 0 | 4.258630  | 0.845024  | -1.142409 |
| 70 | 1  | 0 | 4.574281  | -0.287559 | 0.176493  |
| 71 | 1  | 0 | 3.741819  | -3.589803 | -3.487902 |
| 72 | 1  | 0 | 2.093227  | -3.363479 | -2.894273 |
| 73 | 51 | 0 | -3.986796 | -0.418854 | -0.441406 |
| 74 | 9  | 0 | -3.050816 | 0.768294  | 0.664692  |
| 75 | 9  | 0 | -5.288485 | 0.851643  | -0.798666 |
| 76 | 9  | 0 | -4.795829 | -1.686930 | -1.530668 |
| 77 | 9  | 0 | -4.890201 | -1.071889 | 1.044599  |
| 78 | 9  | 0 | -2.935379 | 0.148154  | -1.877828 |

**LAu(I)-Cl**

SCF Done: E(RB3LYP) = -2082.94143912 A.U.; No imaginary frequency

| Center<br>Number | Atomic<br>Number | Atomic<br>Type | Coordinates (Angstroms) |           |           |
|------------------|------------------|----------------|-------------------------|-----------|-----------|
|                  |                  |                | X                       | Y         | Z         |
| 1                | 6                | 0              | 0.588510                | -1.506714 | 2.500770  |
| 2                | 6                | 0              | 0.114096                | -0.243325 | 2.069226  |
| 3                | 6                | 0              | -0.231878               | 0.704134  | 3.055844  |
| 4                | 6                | 0              | -0.116380               | 0.432262  | 4.416750  |
| 5                | 6                | 0              | 0.358464                | -0.811556 | 4.831999  |
| 6                | 6                | 0              | 0.703598                | -1.762877 | 3.876844  |
| 7                | 15               | 0              | -0.074116               | 0.215276  | 0.281912  |
| 8                | 79               | 0              | 0.370653                | -1.565370 | -1.155187 |
| 9                | 7                | 0              | 0.949577                | -2.542595 | 1.565663  |
| 10               | 6                | 0              | 0.086127                | -3.724793 | 1.665207  |
| 11               | 6                | 0              | 1.221495                | 1.584509  | -0.048560 |
| 12               | 6                | 0              | 1.020421                | 2.147184  | -1.481111 |
| 13               | 6                | 0              | 2.146615                | 3.148041  | -1.825809 |
| 14               | 6                | 0              | 3.513367                | 2.440382  | -1.752092 |
| 15               | 6                | 0              | 3.733401                | 1.905612  | -0.323394 |
| 16               | 6                | 0              | 2.616090                | 0.897176  | 0.023595  |
| 17               | 6                | 0              | 3.706244                | 3.074944  | 0.678847  |
| 18               | 6                | 0              | 2.335640                | 3.774025  | 0.601285  |
| 19               | 6                | 0              | 2.112493                | 4.317664  | -0.822893 |
| 20               | 6                | 0              | 1.219231                | 2.762977  | 0.960059  |
| 21               | 6                | 0              | -1.901892               | 0.750138  | 0.019478  |
| 22               | 6                | 0              | -2.276338               | 2.167122  | 0.529469  |
| 23               | 6                | 0              | -3.778153               | 2.446151  | 0.276439  |
| 24               | 6                | 0              | -4.631161               | 1.397031  | 1.016158  |
| 25               | 6                | 0              | -4.285631               | -0.008702 | 0.485544  |
| 26               | 6                | 0              | -2.790306               | -0.300413 | 0.744562  |
| 27               | 6                | 0              | -4.071255               | 2.382315  | -1.233519 |



|    |    |   |           |           |           |
|----|----|---|-----------|-----------|-----------|
| 28 | 6  | 0 | -3.721869 | 0.975349  | -1.754656 |
| 29 | 6  | 0 | -2.225473 | 0.684471  | -1.503005 |
| 30 | 6  | 0 | -4.578110 | -0.077192 | -1.025309 |
| 31 | 6  | 0 | 2.371568  | -2.898215 | 1.616560  |
| 32 | 1  | 0 | 1.069942  | -2.733285 | 4.198665  |
| 33 | 1  | 0 | 0.458040  | -1.040161 | 5.889321  |
| 34 | 1  | 0 | -0.394860 | 1.190458  | 5.142463  |
| 35 | 1  | 0 | -0.597845 | 1.679041  | 2.763100  |
| 36 | 1  | 0 | -2.541146 | -1.309868 | 0.389016  |
| 37 | 1  | 0 | -2.598551 | -0.281456 | 1.823034  |
| 38 | 1  | 0 | -4.881806 | -0.762740 | 1.015388  |
| 39 | 1  | 0 | -0.960937 | -3.422463 | 1.574034  |
| 40 | 1  | 0 | 0.209746  | -4.277989 | 2.611954  |
| 41 | 1  | 0 | 0.323242  | -4.404296 | 0.840003  |
| 42 | 1  | 0 | -4.352047 | -1.081435 | -1.409310 |
| 43 | 1  | 0 | -5.644692 | 0.107205  | -1.211560 |
| 44 | 1  | 0 | -3.905965 | 0.921370  | -2.835384 |
| 45 | 1  | 0 | -3.482994 | 3.141553  | -1.766935 |
| 46 | 1  | 0 | -5.130262 | 2.604248  | -1.422174 |
| 47 | 1  | 0 | -4.008842 | 3.448722  | 0.658798  |
| 48 | 1  | 0 | -2.080635 | 2.265262  | 1.601457  |
| 49 | 1  | 0 | -1.678383 | 2.928130  | 0.015935  |
| 50 | 1  | 0 | -5.698648 | 1.605398  | 0.863311  |
| 51 | 1  | 0 | -4.444434 | 1.450726  | 2.097514  |
| 52 | 1  | 0 | -1.615310 | 1.404154  | -2.059238 |
| 53 | 1  | 0 | -1.978495 | -0.310494 | -1.893139 |
| 54 | 1  | 0 | 2.781516  | 0.491584  | 1.030075  |
| 55 | 1  | 0 | 2.656449  | 0.053326  | -0.676930 |
| 56 | 1  | 0 | 4.698802  | 1.386657  | -0.264938 |
| 57 | 1  | 0 | 2.593266  | -3.580838 | 0.789315  |
| 58 | 1  | 0 | 2.666153  | -3.393979 | 2.557455  |
| 59 | 1  | 0 | 2.981087  | -1.998788 | 1.494178  |
| 60 | 1  | 0 | 4.508226  | 3.788804  | 0.447428  |
| 61 | 1  | 0 | 3.886720  | 2.705640  | 1.697594  |
| 62 | 1  | 0 | 2.296666  | 4.598652  | 1.324523  |
| 63 | 1  | 0 | 1.147605  | 4.839687  | -0.883384 |
| 64 | 1  | 0 | 2.890794  | 5.051494  | -1.072090 |
| 65 | 1  | 0 | 1.976326  | 3.524132  | -2.842721 |
| 66 | 1  | 0 | 0.055525  | 2.661523  | -1.554949 |
| 67 | 1  | 0 | 1.009582  | 1.326633  | -2.210814 |
| 68 | 1  | 0 | 0.252225  | 3.277051  | 0.959667  |
| 69 | 1  | 0 | 1.393444  | 2.391366  | 1.974770  |
| 70 | 1  | 0 | 4.315159  | 3.141820  | -2.019346 |
| 71 | 1  | 0 | 3.552619  | 1.614837  | -2.476090 |
| 72 | 17 | 0 | 0.824846  | -3.336153 | -2.745781 |

Chemoselectivity studies

N-arylation pathway

**CPI**<sup>amino</sup>

SCF Done: E(RB3LYP) = -3016.43182834 A.U.; No imaginary frequency

| Center<br>Number | Atomic<br>Number | Atomic<br>Type | Coordinates (Angstroms) |           |          |
|------------------|------------------|----------------|-------------------------|-----------|----------|
|                  |                  |                | X                       | Y         | Z        |
| 1                | 6                | 0              | 3.728631                | -3.836559 | 1.592673 |
| 2                | 6                | 0              | 4.209492                | -2.440828 | 2.031840 |
| 3                | 6                | 0              | 3.656852                | -2.110845 | 3.430034 |

|    |    |   |           |           |           |
|----|----|---|-----------|-----------|-----------|
| 4  | 6  | 0 | 2.118249  | -2.132205 | 3.377847  |
| 5  | 6  | 0 | 1.630939  | -3.529432 | 2.952269  |
| 6  | 6  | 0 | 2.188626  | -3.853694 | 1.552524  |
| 7  | 6  | 0 | 3.720269  | -1.377177 | 1.018018  |
| 8  | 6  | 0 | 2.167193  | -1.392129 | 0.950167  |
| 9  | 6  | 0 | 1.610622  | -1.080763 | 2.363482  |
| 10 | 6  | 0 | 1.683372  | -2.807127 | 0.529490  |
| 11 | 15 | 0 | 1.475045  | -0.134210 | -0.333629 |
| 12 | 6  | 0 | 2.292311  | 1.603480  | -0.333084 |
| 13 | 6  | 0 | 3.743231  | 1.595554  | -0.897834 |
| 14 | 6  | 0 | 4.320448  | 3.033995  | -0.878123 |
| 15 | 6  | 0 | 4.328118  | 3.584721  | 0.560192  |
| 16 | 6  | 0 | 2.885267  | 3.611729  | 1.096837  |
| 17 | 6  | 0 | 2.323205  | 2.171484  | 1.110200  |
| 18 | 6  | 0 | 3.462668  | 3.942354  | -1.778139 |
| 19 | 6  | 0 | 2.020097  | 3.963063  | -1.240073 |
| 20 | 6  | 0 | 1.443547  | 2.527879  | -1.251422 |
| 21 | 6  | 0 | 2.012176  | 4.511338  | 0.200400  |
| 22 | 79 | 0 | -0.934268 | 0.033622  | -0.377842 |
| 23 | 7  | 0 | -0.717465 | -0.804068 | -2.523047 |
| 24 | 6  | 0 | -1.230911 | 0.250251  | -3.456642 |
| 25 | 6  | 0 | -1.221946 | 0.947388  | 1.465233  |
| 26 | 6  | 0 | -1.577446 | 0.162562  | 2.562087  |
| 27 | 6  | 0 | -1.899746 | 0.788086  | 3.773388  |
| 28 | 6  | 0 | -1.872784 | 2.179612  | 3.881267  |
| 29 | 6  | 0 | -1.540203 | 2.953227  | 2.768559  |
| 30 | 6  | 0 | -1.216133 | 2.339940  | 1.551101  |
| 31 | 7  | 0 | -3.112150 | 0.390081  | -0.629728 |
| 32 | 6  | 0 | -4.118825 | -0.107013 | 0.347073  |
| 33 | 6  | 0 | -5.119374 | -1.077909 | -0.302345 |
| 34 | 6  | 0 | 1.746367  | -0.859250 | -2.005974 |
| 35 | 6  | 0 | 0.678742  | -1.122066 | -2.879573 |
| 36 | 6  | 0 | 0.928177  | -1.687288 | -4.136924 |
| 37 | 6  | 0 | 2.222873  | -2.005413 | -4.534738 |
| 38 | 6  | 0 | 3.291332  | -1.754473 | -3.675838 |
| 39 | 6  | 0 | 3.051093  | -1.186106 | -2.429255 |
| 40 | 6  | 0 | -1.563819 | -2.035408 | -2.616886 |
| 41 | 17 | 0 | -2.155296 | -2.935290 | 0.752067  |
| 42 | 1  | 0 | 0.110041  | -1.884426 | -4.819658 |
| 43 | 1  | 0 | 2.390583  | -2.445794 | -5.512374 |
| 44 | 1  | 0 | 4.307753  | -1.995951 | -3.969076 |
| 45 | 1  | 0 | 3.896789  | -0.996063 | -1.784427 |
| 46 | 1  | 0 | 0.587931  | -2.835080 | 0.485330  |
| 47 | 1  | 0 | 2.067493  | -3.061511 | -0.464499 |
| 48 | 1  | 0 | 1.834491  | -4.840592 | 1.229167  |
| 49 | 1  | 0 | -1.180918 | -2.785121 | -1.927098 |
| 50 | 1  | 0 | -1.580809 | -2.420943 | -3.640072 |
| 51 | 1  | 0 | -2.583761 | -1.792467 | -2.322315 |
| 52 | 1  | 0 | 0.534074  | -3.562127 | 2.938804  |
| 53 | 1  | 0 | 1.969617  | -4.282975 | 3.675739  |
| 54 | 1  | 0 | 1.706953  | -1.876641 | 4.362417  |
| 55 | 1  | 0 | 4.014628  | -1.125156 | 3.757354  |
| 56 | 1  | 0 | 4.019966  | -2.844563 | 4.161726  |
| 57 | 1  | 0 | 5.306073  | -2.409433 | 2.044694  |
| 58 | 1  | 0 | 4.162279  | -1.602693 | 0.044319  |
| 59 | 1  | 0 | 4.084259  | -0.393810 | 1.331594  |
| 60 | 1  | 0 | 4.097143  | -4.596467 | 2.294329  |
| 61 | 1  | 0 | 4.138408  | -4.084966 | 0.604281  |

|    |    |   |           |           |           |
|----|----|---|-----------|-----------|-----------|
| 62 | 1  | 0 | 1.909328  | -0.081491 | 2.694778  |
| 63 | 1  | 0 | 0.521588  | -1.103878 | 2.342915  |
| 64 | 1  | 0 | 1.449334  | 2.140086  | -2.278102 |
| 65 | 1  | 0 | 0.399251  | 2.555858  | -0.923083 |
| 66 | 1  | 0 | 1.388371  | 4.588728  | -1.882457 |
| 67 | 1  | 0 | -2.265500 | 0.490093  | -3.209907 |
| 68 | 1  | 0 | -1.200550 | -0.101052 | -4.491985 |
| 69 | 1  | 0 | -0.620724 | 1.148647  | -3.358212 |
| 70 | 1  | 0 | 3.874704  | 4.959863  | -1.788914 |
| 71 | 1  | 0 | 3.477765  | 3.576431  | -2.813443 |
| 72 | 1  | 0 | 5.345597  | 2.985202  | -1.265593 |
| 73 | 1  | 0 | 4.961017  | 2.960239  | 1.204940  |
| 74 | 1  | 0 | 4.755925  | 4.595735  | 0.570643  |
| 75 | 1  | 0 | 2.875556  | 3.990339  | 2.126255  |
| 76 | 1  | 0 | 2.964165  | 1.550616  | 1.745226  |
| 77 | 1  | 0 | 1.322954  | 2.166575  | 1.552243  |
| 78 | 1  | 0 | 4.392376  | 0.938463  | -0.312101 |
| 79 | 1  | 0 | 3.746275  | 1.234506  | -1.930093 |
| 80 | 1  | 0 | 2.399521  | 5.538363  | 0.210674  |
| 81 | 1  | 0 | 0.985835  | 4.553880  | 0.588100  |
| 82 | 1  | 0 | -1.630501 | -0.918186 | 2.471493  |
| 83 | 1  | 0 | -2.174174 | 0.176481  | 4.628581  |
| 84 | 1  | 0 | -1.535048 | 4.037686  | 2.833249  |
| 85 | 1  | 0 | -0.982972 | 2.961235  | 0.693653  |
| 86 | 1  | 0 | -2.120821 | 2.659078  | 4.823770  |
| 87 | 1  | 0 | -3.607612 | -0.683066 | 1.122180  |
| 88 | 6  | 0 | -4.799416 | 1.133299  | 0.964552  |
| 89 | 1  | 0 | -3.224205 | 1.415620  | -0.637546 |
| 90 | 1  | 0 | -3.391960 | 0.086516  | -1.564498 |
| 91 | 7  | 0 | -5.585985 | 0.900863  | 2.030362  |
| 92 | 8  | 0 | -4.627198 | 2.249376  | 0.467848  |
| 93 | 1  | 0 | -5.842582 | -1.402623 | 0.448383  |
| 94 | 16 | 0 | -6.012936 | -0.314173 | -1.734825 |
| 95 | 1  | 0 | -4.567922 | -1.956161 | -0.643725 |
| 96 | 1  | 0 | -6.163606 | -1.450454 | -2.442351 |
| 97 | 1  | 0 | -6.047443 | 1.680629  | 2.480699  |
| 98 | 1  | 0 | -5.641388 | -0.002283 | 2.479811  |

CP2<sup>amino</sup>

SCF Done: E(RB3LYP) = -2555.59011940 A.U.; No imaginary frequency

| Center<br>Number | Atomic<br>Number | Atomic<br>Type | Coordinates (Angstroms) |           |           |
|------------------|------------------|----------------|-------------------------|-----------|-----------|
|                  |                  |                | X                       | Y         | Z         |
| 1                | 6                | 0              | 2.471323                | -4.667382 | 0.564176  |
| 2                | 6                | 0              | 3.574981                | -3.628427 | 0.836225  |
| 3                | 6                | 0              | 3.662030                | -3.348383 | 2.348152  |
| 4                | 6                | 0              | 2.310887                | -2.793039 | 2.837147  |
| 5                | 6                | 0              | 1.196480                | -3.822177 | 2.565969  |
| 6                | 6                | 0              | 1.121945                | -4.108430 | 1.053340  |
| 7                | 6                | 0              | 3.251779                | -2.322296 | 0.070151  |
| 8                | 6                | 0              | 1.900516                | -1.734874 | 0.565242  |
| 9                | 6                | 0              | 2.005595                | -1.473378 | 2.091628  |
| 10               | 6                | 0              | 0.798276                | -2.799534 | 0.297098  |
| 11               | 15               | 0              | 1.362020                | -0.132902 | -0.338854 |
| 12               | 6                | 0              | 2.360683                | 1.447271  | 0.102285  |
| 13               | 6                | 0              | 3.899724                | 1.241952  | 0.117558  |

|    |    |   |           |           |           |
|----|----|---|-----------|-----------|-----------|
| 14 | 6  | 0 | 4.607757  | 2.581911  | 0.434948  |
| 15 | 6  | 0 | 4.165888  | 3.087909  | 1.820340  |
| 16 | 6  | 0 | 2.642026  | 3.309532  | 1.811665  |
| 17 | 6  | 0 | 1.924547  | 1.977383  | 1.495106  |
| 18 | 6  | 0 | 4.246158  | 3.625230  | -0.639975 |
| 19 | 6  | 0 | 2.721761  | 3.852466  | -0.637321 |
| 20 | 6  | 0 | 2.003224  | 2.522452  | -0.963578 |
| 21 | 6  | 0 | 2.274808  | 4.359683  | 0.746554  |
| 22 | 79 | 0 | -1.073867 | 0.194063  | -0.323696 |
| 23 | 7  | 0 | -0.850568 | -0.227791 | -2.595850 |
| 24 | 6  | 0 | -1.451367 | 0.956173  | -3.288193 |
| 25 | 6  | 0 | -1.361476 | 0.602487  | 1.671505  |
| 26 | 6  | 0 | -1.463627 | -0.416810 | 2.619013  |
| 27 | 6  | 0 | -1.739724 | -0.098807 | 3.955841  |
| 28 | 6  | 0 | -1.915280 | 1.230106  | 4.343163  |
| 29 | 6  | 0 | -1.823056 | 2.245753  | 3.387861  |
| 30 | 6  | 0 | -1.551879 | 1.935444  | 2.050643  |
| 31 | 7  | 0 | -3.129142 | 0.574848  | -0.616693 |
| 32 | 6  | 0 | -4.161776 | 0.438343  | 0.404855  |
| 33 | 6  | 0 | -4.552811 | -0.990995 | 0.813564  |
| 34 | 6  | 0 | 1.622811  | -0.424399 | -2.142370 |
| 35 | 6  | 0 | 0.543914  | -0.417793 | -3.042866 |
| 36 | 6  | 0 | 0.773729  | -0.606814 | -4.412566 |
| 37 | 6  | 0 | 2.061161  | -0.796546 | -4.904305 |
| 38 | 6  | 0 | 3.141727  | -0.805785 | -4.023933 |
| 39 | 6  | 0 | 2.918603  | -0.623607 | -2.663046 |
| 40 | 6  | 0 | -1.629580 | -1.468603 | -2.902210 |
| 41 | 1  | 0 | -0.055758 | -0.607305 | -5.110159 |
| 42 | 1  | 0 | 2.213757  | -0.937492 | -5.969685 |
| 43 | 1  | 0 | 4.153036  | -0.953947 | -4.388825 |
| 44 | 1  | 0 | 3.771217  | -0.641594 | -1.999532 |
| 45 | 1  | 0 | -0.182983 | -2.429049 | 0.615268  |
| 46 | 1  | 0 | 0.730392  | -3.005122 | -0.778915 |
| 47 | 1  | 0 | 0.321401  | -4.830249 | 0.848660  |
| 48 | 1  | 0 | -1.188724 | -2.308910 | -2.364365 |
| 49 | 1  | 0 | -1.623659 | -1.679305 | -3.975953 |
| 50 | 1  | 0 | -2.664027 | -1.342497 | -2.583040 |
| 51 | 1  | 0 | 0.231721  | -3.444248 | 2.930350  |
| 52 | 1  | 0 | 1.402303  | -4.750993 | 3.114066  |
| 53 | 1  | 0 | 2.363093  | -2.575129 | 3.911153  |
| 54 | 1  | 0 | 4.465265  | -2.628701 | 2.557059  |
| 55 | 1  | 0 | 3.909666  | -4.272321 | 2.887303  |
| 56 | 1  | 0 | 4.538722  | -4.004279 | 0.470210  |
| 57 | 1  | 0 | 3.196619  | -2.551384 | -0.998181 |
| 58 | 1  | 0 | 4.067621  | -1.605999 | 0.214558  |
| 59 | 1  | 0 | 2.701028  | -5.606854 | 1.084096  |
| 60 | 1  | 0 | 2.421201  | -4.896728 | -0.508820 |
| 61 | 1  | 0 | 2.813033  | -0.762011 | 2.295230  |
| 62 | 1  | 0 | 1.079308  | -1.033310 | 2.474584  |
| 63 | 1  | 0 | 2.301560  | 2.185574  | -1.962505 |
| 64 | 1  | 0 | 0.917466  | 2.686791  | -0.984960 |
| 65 | 1  | 0 | 2.452779  | 4.584622  | -1.409067 |
| 66 | 1  | 0 | -2.437809 | 1.147896  | -2.866925 |
| 67 | 1  | 0 | -1.544726 | 0.779374  | -4.363796 |
| 68 | 1  | 0 | -0.812576 | 1.823692  | -3.114608 |
| 69 | 1  | 0 | 4.767393  | 4.569918  | -0.436283 |
| 70 | 1  | 0 | 4.576907  | 3.281726  | -1.629505 |
| 71 | 1  | 0 | 5.690174  | 2.402176  | 0.430128  |

|    |    |   |           |           |           |
|----|----|---|-----------|-----------|-----------|
| 72 | 1  | 0 | 4.439867  | 2.359652  | 2.595795  |
| 73 | 1  | 0 | 4.683660  | 4.025785  | 2.061425  |
| 74 | 1  | 0 | 2.308147  | 3.649116  | 2.800336  |
| 75 | 1  | 0 | 2.156706  | 1.249277  | 2.278139  |
| 76 | 1  | 0 | 0.844910  | 2.134205  | 1.514173  |
| 77 | 1  | 0 | 4.181397  | 0.498997  | 0.871915  |
| 78 | 1  | 0 | 4.256503  | 0.882271  | -0.851042 |
| 79 | 1  | 0 | 2.765389  | 5.315584  | 0.973692  |
| 80 | 1  | 0 | 1.191869  | 4.543967  | 0.752023  |
| 81 | 1  | 0 | -1.347666 | -1.457745 | 2.336766  |
| 82 | 1  | 0 | -1.819189 | -0.898456 | 4.687323  |
| 83 | 1  | 0 | -1.966003 | 3.283756  | 3.675950  |
| 84 | 1  | 0 | -1.498771 | 2.733991  | 1.316615  |
| 85 | 1  | 0 | -2.129169 | 1.473362  | 5.379943  |
| 86 | 1  | 0 | -3.817496 | 0.935038  | 1.319048  |
| 87 | 6  | 0 | -5.437183 | 1.229166  | -0.003124 |
| 88 | 1  | 0 | -3.386754 | -0.094468 | -1.345905 |
| 89 | 7  | 0 | -5.208575 | 2.263868  | -0.838147 |
| 90 | 8  | 0 | -6.544427 | 0.949356  | 0.460279  |
| 91 | 1  | 0 | -5.339697 | -0.949456 | 1.567317  |
| 92 | 16 | 0 | -5.225394 | -2.008887 | -0.581823 |
| 93 | 1  | 0 | -3.692136 | -1.513833 | 1.231233  |
| 94 | 1  | 0 | -4.143004 | -2.786452 | -0.782405 |
| 95 | 1  | 0 | -5.980391 | 2.823904  | -1.172901 |
| 96 | 1  | 0 | -4.286089 | 2.359469  | -1.243675 |

TS<sup>rd-amino</sup>

SCF Done: E(RB3LYP) = -2555.56744685 A.U.; An imaginary frequency of -334.7644 cm<sup>-1</sup>

| Center<br>Number | Atomic<br>Number | Atomic<br>Type | Coordinates (Angstroms) |           |           |
|------------------|------------------|----------------|-------------------------|-----------|-----------|
|                  |                  |                | X                       | Y         | Z         |
| 1                | 6                | 0              | -3.193150               | -2.178034 | 1.375260  |
| 2                | 6                | 0              | -1.854839               | -1.746812 | 1.268319  |
| 3                | 6                | 0              | -0.885139               | -2.382623 | 2.072455  |
| 4                | 6                | 0              | -1.272718               | -3.410762 | 2.943975  |
| 5                | 6                | 0              | -2.599875               | -3.820038 | 3.034058  |
| 6                | 6                | 0              | -3.567088               | -3.199467 | 2.244091  |
| 7                | 15               | 0              | -1.401992               | -0.368108 | 0.126376  |
| 8                | 79               | 0              | 0.961179                | -0.056959 | 0.418834  |
| 9                | 7                | 0              | 3.023248                | 0.235688  | 0.520750  |
| 10               | 6                | 0              | 4.036910                | -0.219780 | -0.411987 |
| 11               | 6                | 0              | 5.211298                | 0.756006  | -0.685238 |
| 12               | 8                | 0              | 6.204100                | 0.359498  | -1.293610 |
| 13               | 7                | 0              | 0.518131                | -1.993508 | 2.028818  |
| 14               | 6                | 0              | 1.382890                | -3.119896 | 1.616172  |
| 15               | 6                | 0              | -1.729102               | -0.993278 | -1.650697 |
| 16               | 6                | 0              | -3.127884               | -1.628113 | -1.875223 |
| 17               | 6                | 0              | -3.258737               | -2.121164 | -3.336957 |
| 18               | 6                | 0              | -2.193721               | -3.199592 | -3.610255 |
| 19               | 6                | 0              | -0.794349               | -2.591368 | -3.399299 |
| 20               | 6                | 0              | -0.658825               | -2.084533 | -1.945712 |
| 21               | 6                | 0              | -0.589214               | -1.411896 | -4.370495 |
| 22               | 6                | 0              | -1.662202               | -0.338991 | -4.103360 |
| 23               | 6                | 0              | -3.064442               | -0.943066 | -4.311094 |
| 24               | 6                | 0              | -1.544214               | 0.178343  | -2.651693 |
| 25               | 6                | 0              | -2.413673               | 1.165388  | 0.670069  |

|    |    |   |           |           |           |
|----|----|---|-----------|-----------|-----------|
| 26 | 6  | 0 | -3.923215 | 1.113481  | 0.316509  |
| 27 | 6  | 0 | -4.635386 | 2.381808  | 0.846023  |
| 28 | 6  | 0 | -4.021424 | 3.632813  | 0.190336  |
| 29 | 6  | 0 | -2.524678 | 3.704906  | 0.546573  |
| 30 | 6  | 0 | -1.803597 | 2.440840  | 0.024875  |
| 31 | 6  | 0 | -4.474002 | 2.464063  | 2.376819  |
| 32 | 6  | 0 | -2.975949 | 2.547969  | 2.728542  |
| 33 | 6  | 0 | -2.255824 | 1.281286  | 2.213524  |
| 34 | 6  | 0 | -2.359047 | 3.799182  | 2.075051  |
| 35 | 6  | 0 | 1.843426  | 1.702342  | -0.479938 |
| 36 | 6  | 0 | 1.966058  | 1.739235  | -1.869858 |
| 37 | 6  | 0 | 2.056153  | 2.982016  | -2.508111 |
| 38 | 6  | 0 | 2.041347  | 4.167551  | -1.770222 |
| 39 | 6  | 0 | 1.932497  | 4.110409  | -0.377521 |
| 40 | 6  | 0 | 1.837544  | 2.878526  | 0.280107  |
| 41 | 6  | 0 | 0.966889  | -1.434479 | 3.325407  |
| 42 | 6  | 0 | 4.612244  | -1.604881 | -0.045959 |
| 43 | 16 | 0 | 5.493387  | -1.677436 | 1.567567  |
| 44 | 7  | 0 | 5.098303  | 2.022764  | -0.214539 |
| 45 | 1  | 0 | -0.526130 | -3.897368 | 3.563216  |
| 46 | 1  | 0 | -2.874045 | -4.617985 | 3.717591  |
| 47 | 1  | 0 | -4.607324 | -3.504707 | 2.300190  |
| 48 | 1  | 0 | -3.961516 | -1.714234 | 0.771791  |
| 49 | 1  | 0 | 0.351091  | -1.680442 | -1.798708 |
| 50 | 1  | 0 | -0.777028 | -2.923131 | -1.247399 |
| 51 | 1  | 0 | -0.025071 | -3.354798 | -3.571409 |
| 52 | 1  | 0 | 1.067181  | -3.482571 | 0.635547  |
| 53 | 1  | 0 | 1.353293  | -3.950946 | 2.333510  |
| 54 | 1  | 0 | 2.411683  | -2.761751 | 1.550698  |
| 55 | 1  | 0 | 0.415210  | -0.985565 | -4.242541 |
| 56 | 1  | 0 | -0.659208 | -1.762737 | -5.408672 |
| 57 | 1  | 0 | -1.517553 | 0.509467  | -4.783997 |
| 58 | 1  | 0 | -3.834592 | -0.178121 | -4.142155 |
| 59 | 1  | 0 | -3.176992 | -1.290203 | -5.346856 |
| 60 | 1  | 0 | -4.261792 | -2.547832 | -3.463671 |
| 61 | 1  | 0 | -3.268017 | -2.482154 | -1.205239 |
| 62 | 1  | 0 | -3.924700 | -0.907476 | -1.663019 |
| 63 | 1  | 0 | -2.290282 | -3.574501 | -4.637900 |
| 64 | 1  | 0 | -2.340406 | -4.056632 | -2.939056 |
| 65 | 1  | 0 | -2.315579 | 0.938948  | -2.487429 |
| 66 | 1  | 0 | -0.571972 | 0.662231  | -2.500939 |
| 67 | 1  | 0 | -2.674343 | 0.397565  | 2.707803  |
| 68 | 1  | 0 | -1.191169 | 1.329858  | 2.480064  |
| 69 | 1  | 0 | -2.851479 | 2.595631  | 3.817822  |
| 70 | 1  | 0 | 1.977488  | -1.034218 | 3.204203  |
| 71 | 1  | 0 | 0.981911  | -2.193567 | 4.119278  |
| 72 | 1  | 0 | 0.299287  | -0.622331 | 3.620947  |
| 73 | 1  | 0 | -5.001233 | 3.346542  | 2.762967  |
| 74 | 1  | 0 | -4.926893 | 1.584208  | 2.853845  |
| 75 | 1  | 0 | -5.699313 | 2.308787  | 0.587456  |
| 76 | 1  | 0 | -4.151032 | 3.592245  | -0.899813 |
| 77 | 1  | 0 | -4.538130 | 4.535456  | 0.542863  |
| 78 | 1  | 0 | -2.068222 | 4.580600  | 0.067741  |
| 79 | 1  | 0 | -1.889602 | 2.403957  | -1.065381 |
| 80 | 1  | 0 | -0.738310 | 2.506482  | 0.260767  |
| 81 | 1  | 0 | -4.057643 | 1.051077  | -0.768940 |
| 82 | 1  | 0 | -4.401228 | 0.234373  | 0.758620  |
| 83 | 1  | 0 | -2.852888 | 4.704079  | 2.453748  |

|    |   |   |           |           |           |
|----|---|---|-----------|-----------|-----------|
| 84 | 1 | 0 | -1.295211 | 3.878578  | 2.337211  |
| 85 | 1 | 0 | 1.977924  | 0.828426  | -2.459160 |
| 86 | 1 | 0 | 2.136194  | 3.011978  | -3.591335 |
| 87 | 1 | 0 | 1.927528  | 5.023554  | 0.211199  |
| 88 | 1 | 0 | 1.759377  | 2.844517  | 1.362663  |
| 89 | 1 | 0 | 2.121179  | 5.126202  | -2.273286 |
| 90 | 1 | 0 | 3.556900  | -0.366870 | -1.388454 |
| 91 | 1 | 0 | 3.356404  | 0.826414  | 1.274055  |
| 92 | 1 | 0 | 5.363888  | -1.878936 | -0.788091 |
| 93 | 1 | 0 | 3.814998  | -2.349586 | -0.062498 |
| 94 | 1 | 0 | 4.436552  | -1.369633 | 2.348673  |
| 95 | 1 | 0 | 5.818478  | 2.679201  | -0.489639 |
| 96 | 1 | 0 | 4.204561  | 2.413346  | 0.052910  |

CP3<sup>amino</sup>

SCF Done: E(RB3LYP) = -2555.66126622 A.U.; No imaginary frequency

| Center<br>Number | Atomic<br>Number | Atomic<br>Type | Coordinates (Angstroms) |           |           |
|------------------|------------------|----------------|-------------------------|-----------|-----------|
|                  |                  |                | X                       | Y         | Z         |
| 1                | 6                | 0              | -4.076742               | 1.570680  | -1.240110 |
| 2                | 6                | 0              | -3.564086               | 1.061561  | -0.041666 |
| 3                | 6                | 0              | -3.485759               | 1.878442  | 1.091702  |
| 4                | 6                | 0              | -3.929425               | 3.199541  | 1.019761  |
| 5                | 6                | 0              | -4.442446               | 3.715123  | -0.173940 |
| 6                | 6                | 0              | -4.511975               | 2.897069  | -1.302417 |
| 7                | 79               | 0              | -0.843195               | -0.163339 | -0.183639 |
| 8                | 7                | 0              | -0.025650               | -0.239965 | -2.991568 |
| 9                | 6                | 0              | -0.824050               | 0.823514  | -3.613776 |
| 10               | 15               | 0              | 1.476761                | 0.102199  | -0.180922 |
| 11               | 6                | 0              | 1.859916                | 1.767923  | 0.699096  |
| 12               | 6                | 0              | 3.315428                | 1.936172  | 1.209786  |
| 13               | 6                | 0              | 3.496217                | 3.329589  | 1.858314  |
| 14               | 6                | 0              | 2.545355                | 3.466510  | 3.061762  |
| 15               | 6                | 0              | 1.092532                | 3.316371  | 2.573404  |
| 16               | 6                | 0              | 0.902157                | 1.930757  | 1.916438  |
| 17               | 6                | 0              | 3.185711                | 4.428968  | 0.823808  |
| 18               | 6                | 0              | 1.727660                | 4.283484  | 0.344919  |
| 19               | 6                | 0              | 1.541885                | 2.900273  | -0.318005 |
| 20               | 6                | 0              | 0.772209                | 4.418873  | 1.546102  |
| 21               | 6                | 0              | 2.173175                | 0.204613  | -1.893536 |
| 22               | 6                | 0              | 3.547795                | 0.479105  | -2.052850 |
| 23               | 6                | 0              | 4.143195                | 0.561582  | -3.308954 |
| 24               | 6                | 0              | 3.368680                | 0.365834  | -4.452126 |
| 25               | 6                | 0              | 2.009253                | 0.099694  | -4.318641 |
| 26               | 6                | 0              | 1.391501                | 0.018917  | -3.060310 |
| 27               | 6                | 0              | 2.257948                | -1.451322 | 0.614486  |
| 28               | 6                | 0              | 3.809215                | -1.507856 | 0.594194  |
| 29               | 6                | 0              | 4.300021                | -2.827938 | 1.237761  |
| 30               | 6                | 0              | 3.765099                | -4.024710 | 0.429203  |
| 31               | 6                | 0              | 2.225104                | -3.991980 | 0.440220  |
| 32               | 6                | 0              | 1.730032                | -2.672870 | -0.193509 |
| 33               | 6                | 0              | 3.800153                | -2.920947 | 2.692615  |
| 34               | 6                | 0              | 2.259613                | -2.896419 | 2.703944  |
| 35               | 6                | 0              | 1.768077                | -1.569759 | 2.082928  |
| 36               | 6                | 0              | 1.714713                | -4.087213 | 1.891410  |
| 37               | 7                | 0              | -3.079373               | -0.313730 | -0.005872 |

|    |    |   |           |           |           |
|----|----|---|-----------|-----------|-----------|
| 38 | 6  | 0 | -3.542186 | -1.164880 | 1.131091  |
| 39 | 6  | 0 | -2.917435 | -2.570071 | 1.060532  |
| 40 | 16 | 0 | -3.283130 | -3.513343 | -0.483048 |
| 41 | 6  | 0 | -5.070706 | -1.312681 | 1.344038  |
| 42 | 7  | 0 | -5.923337 | -0.841385 | 0.407248  |
| 43 | 8  | 0 | -5.445581 | -1.909458 | 2.351076  |
| 44 | 6  | 0 | -0.393455 | -1.566410 | -3.499745 |
| 45 | 1  | 0 | 1.404907  | -0.046976 | -5.208984 |
| 46 | 1  | 0 | 3.817597  | 0.422737  | -5.439620 |
| 47 | 1  | 0 | 5.204576  | 0.776235  | -3.388177 |
| 48 | 1  | 0 | 4.173279  | 0.634201  | -1.183843 |
| 49 | 1  | 0 | 0.633007  | -2.667432 | -0.218058 |
| 50 | 1  | 0 | 2.077003  | -2.610633 | -1.232812 |
| 51 | 1  | 0 | 1.829416  | -4.828700 | -0.149534 |
| 52 | 1  | 0 | 0.187880  | -2.333650 | -2.981673 |
| 53 | 1  | 0 | -0.231832 | -1.678780 | -4.585232 |
| 54 | 1  | 0 | -1.455564 | -1.737822 | -3.295164 |
| 55 | 1  | 0 | 0.616137  | -4.087093 | 1.908313  |
| 56 | 1  | 0 | 2.042753  | -5.032535 | 2.343967  |
| 57 | 1  | 0 | 1.893531  | -2.951980 | 3.737010  |
| 58 | 1  | 0 | 4.196515  | -2.085013 | 3.285081  |
| 59 | 1  | 0 | 4.166633  | -3.846428 | 3.156611  |
| 60 | 1  | 0 | 5.397353  | -2.828153 | 1.220977  |
| 61 | 1  | 0 | 4.174211  | -1.459654 | -0.436590 |
| 62 | 1  | 0 | 4.241083  | -0.661566 | 1.137061  |
| 63 | 1  | 0 | 4.125210  | -4.966476 | 0.864508  |
| 64 | 1  | 0 | 4.137906  | -3.982335 | -0.603260 |
| 65 | 1  | 0 | 2.151575  | -0.733928 | 2.679812  |
| 66 | 1  | 0 | 0.671814  | -1.520572 | 2.121292  |
| 67 | 1  | 0 | 2.200313  | 2.824042  | -1.190003 |
| 68 | 1  | 0 | 0.510012  | 2.797012  | -0.681472 |
| 69 | 1  | 0 | 1.502033  | 5.056672  | -0.400562 |
| 70 | 1  | 0 | -1.882583 | 0.631789  | -3.413240 |
| 71 | 1  | 0 | -0.689057 | 0.888863  | -4.706463 |
| 72 | 1  | 0 | -0.557717 | 1.787265  | -3.171420 |
| 73 | 1  | 0 | 3.337401  | 5.419604  | 1.272821  |
| 74 | 1  | 0 | 3.874256  | 4.352922  | -0.028762 |
| 75 | 1  | 0 | 4.537505  | 3.417948  | 2.193368  |
| 76 | 1  | 0 | 2.774220  | 2.701324  | 3.816153  |
| 77 | 1  | 0 | 2.683127  | 4.444090  | 3.542966  |
| 78 | 1  | 0 | 0.403741  | 3.389659  | 3.424807  |
| 79 | 1  | 0 | 1.083538  | 1.145617  | 2.658578  |
| 80 | 1  | 0 | -0.138721 | 1.827012  | 1.587348  |
| 81 | 1  | 0 | 3.548818  | 1.164334  | 1.951223  |
| 82 | 1  | 0 | 4.035190  | 1.833361  | 0.391951  |
| 83 | 1  | 0 | 0.884416  | 5.409233  | 2.007299  |
| 84 | 1  | 0 | -0.271294 | 4.333997  | 1.212836  |
| 85 | 1  | 0 | -3.073928 | 1.498068  | 2.020480  |
| 86 | 1  | 0 | -3.868902 | 3.827333  | 1.903729  |
| 87 | 1  | 0 | -4.908988 | 3.282700  | -2.236591 |
| 88 | 1  | 0 | -4.132372 | 0.940198  | -2.124329 |
| 89 | 1  | 0 | -4.784671 | 4.744222  | -0.222267 |
| 90 | 1  | 0 | -3.167155 | -0.711458 | 2.051415  |
| 91 | 1  | 0 | -3.340221 | -0.782622 | -0.876993 |
| 92 | 1  | 0 | -3.333269 | -3.152883 | 1.882985  |
| 93 | 1  | 0 | -1.835487 | -2.513481 | 1.191015  |
| 94 | 1  | 0 | -2.195796 | -3.130995 | -1.184151 |
| 95 | 1  | 0 | -6.914009 | -0.906154 | 0.607246  |



96            1            0            -5.647379    -0.204801    -0.326389

---

**TS**<sup>neutralNH2</sup>

SCF Done: E(RB3LYP) = -3016.38979831 A.U.; An imaginary frequency of -275.4366 cm<sup>-1</sup>

---

| Center<br>Number | Atomic<br>Number | Atomic<br>Type | Coordinates (Angstroms) |           |           |
|------------------|------------------|----------------|-------------------------|-----------|-----------|
|                  |                  |                | X                       | Y         | Z         |
| 1                | 6                | 0              | 3.254759                | 1.240065  | 2.248812  |
| 2                | 6                | 0              | 2.045982                | 0.544901  | 2.029753  |
| 3                | 6                | 0              | 1.402988                | -0.020807 | 3.147788  |
| 4                | 6                | 0              | 1.941092                | 0.167022  | 4.430232  |
| 5                | 6                | 0              | 3.122701                | 0.873741  | 4.624090  |
| 6                | 6                | 0              | 3.792664                | 1.402061  | 3.521617  |
| 7                | 15               | 0              | 1.366626                | 0.393565  | 0.312316  |
| 8                | 79               | 0              | -0.610543               | -1.012489 | 0.609537  |
| 9                | 7                | 0              | -3.464691               | -0.887908 | -0.651823 |
| 10               | 6                | 0              | -3.937070               | 0.207581  | 0.200775  |
| 11               | 6                | 0              | -4.198505               | 1.427962  | -0.701256 |
| 12               | 8                | 0              | -4.286672               | 1.306676  | -1.922740 |
| 13               | 7                | 0              | 0.208854                | -0.842311 | 3.012377  |
| 14               | 6                | 0              | -0.949051               | -0.243737 | 3.719267  |
| 15               | 6                | 0              | 1.026287                | 2.195656  | -0.299946 |
| 16               | 6                | 0              | 2.065256                | 3.237893  | 0.199769  |
| 17               | 6                | 0              | 1.681273                | 4.656364  | -0.286600 |
| 18               | 6                | 0              | 0.302037                | 5.036540  | 0.281944  |
| 19               | 6                | 0              | -0.743484               | 4.023546  | -0.219313 |
| 20               | 6                | 0              | -0.364773               | 2.603638  | 0.259458  |
| 21               | 6                | 0              | -0.791879               | 4.046177  | -1.760038 |
| 22               | 6                | 0              | 0.594977                | 3.675580  | -2.321375 |
| 23               | 6                | 0              | 1.640219                | 4.691354  | -1.825298 |
| 24               | 6                | 0              | 0.997804                | 2.258090  | -1.850834 |
| 25               | 6                | 0              | 2.686515                | -0.586635 | -0.686147 |
| 26               | 6                | 0              | 3.976137                | 0.219585  | -1.002625 |
| 27               | 6                | 0              | 4.977928                | -0.672185 | -1.777192 |
| 28               | 6                | 0              | 4.345412                | -1.151658 | -3.096866 |
| 29               | 6                | 0              | 3.081078                | -1.971845 | -2.781093 |
| 30               | 6                | 0              | 2.067968                | -1.087428 | -2.019085 |
| 31               | 6                | 0              | 5.354372                | -1.888009 | -0.909214 |
| 32               | 6                | 0              | 4.085679                | -2.707476 | -0.601511 |
| 33               | 6                | 0              | 3.074338                | -1.826737 | 0.168482  |
| 34               | 6                | 0              | 3.452153                | -3.192949 | -1.918917 |
| 35               | 6                | 0              | -1.526310               | -1.278121 | -1.499427 |
| 36               | 6                | 0              | -1.436605               | -0.287608 | -2.478095 |
| 37               | 6                | 0              | -1.145386               | -0.663978 | -3.790774 |
| 38               | 6                | 0              | -0.999428               | -2.012742 | -4.132522 |
| 39               | 6                | 0              | -1.170271               | -2.988612 | -3.149516 |
| 40               | 6                | 0              | -1.467865               | -2.636794 | -1.825579 |
| 41               | 6                | 0              | 0.475236                | -2.219354 | 3.500035  |
| 42               | 6                | 0              | -5.177792               | -0.175277 | 1.045998  |
| 43               | 16               | 0              | -6.737429               | -0.479647 | 0.118077  |
| 44               | 7                | 0              | -4.346019               | 2.604198  | -0.055735 |
| 45               | 1                | 0              | 1.434335                | -0.258442 | 5.289649  |
| 46               | 1                | 0              | 3.519773                | 0.999944  | 5.626784  |
| 47               | 1                | 0              | 4.725251                | 1.943634  | 3.645086  |
| 48               | 1                | 0              | 3.789478                | 1.674418  | 1.417552  |
| 49               | 1                | 0              | -1.130467               | 1.896050  | -0.075639 |

|    |    |   |           |           |           |
|----|----|---|-----------|-----------|-----------|
| 50 | 1  | 0 | -0.354184 | 2.569259  | 1.356637  |
| 51 | 1  | 0 | -1.731496 | 4.270287  | 0.188071  |
| 52 | 1  | 0 | -1.135896 | 0.756213  | 3.320661  |
| 53 | 1  | 0 | -0.774028 | -0.171405 | 4.801075  |
| 54 | 1  | 0 | -1.824660 | -0.871019 | 3.543143  |
| 55 | 1  | 0 | -1.555164 | 3.346098  | -2.126424 |
| 56 | 1  | 0 | -1.082501 | 5.044859  | -2.111967 |
| 57 | 1  | 0 | 0.564771  | 3.674706  | -3.418123 |
| 58 | 1  | 0 | 2.629371  | 4.450024  | -2.237682 |
| 59 | 1  | 0 | 1.383879  | 5.700693  | -2.173566 |
| 60 | 1  | 0 | 2.442598  | 5.354843  | 0.082994  |
| 61 | 1  | 0 | 2.106009  | 3.244634  | 1.292237  |
| 62 | 1  | 0 | 3.067435  | 2.994036  | -0.170980 |
| 63 | 1  | 0 | 0.027875  | 6.050961  | -0.036506 |
| 64 | 1  | 0 | 0.331708  | 5.040212  | 1.379964  |
| 65 | 1  | 0 | 1.986824  | 2.022777  | -2.256976 |
| 66 | 1  | 0 | 0.302659  | 1.523283  | -2.259950 |
| 67 | 1  | 0 | 3.516293  | -1.510537 | 1.119714  |
| 68 | 1  | 0 | 2.180091  | -2.419207 | 0.404194  |
| 69 | 1  | 0 | 4.341584  | -3.567584 | 0.030099  |
| 70 | 1  | 0 | -0.405205 | -2.832227 | 3.309226  |
| 71 | 1  | 0 | 0.697079  | -2.232250 | 4.575054  |
| 72 | 1  | 0 | 1.327331  | -2.633394 | 2.956340  |
| 73 | 1  | 0 | 6.086737  | -2.513816 | -1.436336 |
| 74 | 1  | 0 | 5.827979  | -1.555857 | 0.024585  |
| 75 | 1  | 0 | 5.873073  | -0.073231 | -1.987090 |
| 76 | 1  | 0 | 4.092654  | -0.292060 | -3.732434 |
| 77 | 1  | 0 | 5.064657  | -1.764597 | -3.656427 |
| 78 | 1  | 0 | 2.607836  | -2.303976 | -3.713636 |
| 79 | 1  | 0 | 1.777126  | -0.244819 | -2.652617 |
| 80 | 1  | 0 | 1.163049  | -1.668261 | -1.819560 |
| 81 | 1  | 0 | 3.744314  | 1.109072  | -1.597886 |
| 82 | 1  | 0 | 4.460304  | 0.556545  | -0.081878 |
| 83 | 1  | 0 | 4.156613  | -3.838331 | -2.460304 |
| 84 | 1  | 0 | 2.557366  | -3.795502 | -1.711207 |
| 85 | 1  | 0 | -1.060907 | 0.108783  | -4.550108 |
| 86 | 1  | 0 | -1.077219 | -4.042661 | -3.397292 |
| 87 | 1  | 0 | -1.608756 | -3.403522 | -1.074344 |
| 88 | 1  | 0 | -0.785515 | -2.297979 | -5.157861 |
| 89 | 1  | 0 | -3.148122 | 0.453858  | 0.921987  |
| 90 | 1  | 0 | -3.938118 | -0.849214 | -1.555197 |
| 91 | 1  | 0 | -3.574451 | -1.795589 | -0.200850 |
| 92 | 1  | 0 | -5.414864 | 0.641735  | 1.732708  |
| 93 | 1  | 0 | -4.937923 | -1.051637 | 1.653115  |
| 94 | 1  | 0 | -6.405112 | -1.675586 | -0.409729 |
| 95 | 1  | 0 | -4.543420 | 3.438038  | -0.593682 |
| 96 | 1  | 0 | -4.210239 | 2.706582  | 0.940282  |
| 97 | 1  | 0 | -1.634230 | 0.748464  | -2.240898 |
| 98 | 17 | 0 | -2.213733 | -2.755641 | 1.478708  |

Cysteine

SCF Done: E(RB3LYP) = -721.921135171 A.U.; No imaginary frequency

| Center<br>Number | Atomic<br>Number | Atomic<br>Type | Coordinates (Angstroms) |          |          |
|------------------|------------------|----------------|-------------------------|----------|----------|
|                  |                  |                | X                       | Y        | Z        |
| 1                | 6                | 0              | -0.982560               | 0.796248 | 0.437882 |

|    |    |   |           |           |           |
|----|----|---|-----------|-----------|-----------|
| 2  | 16 | 0 | -2.293296 | -0.272678 | -0.285576 |
| 3  | 6  | 0 | 0.382134  | 0.702233  | -0.252879 |
| 4  | 7  | 0 | 1.250985  | 1.776258  | 0.260658  |
| 5  | 6  | 0 | 1.068685  | -0.630760 | 0.041084  |
| 6  | 8  | 0 | 2.285422  | -0.682821 | -0.535098 |
| 7  | 8  | 0 | 0.611632  | -1.542039 | 0.701125  |
| 8  | 1  | 0 | -1.365294 | 1.814900  | 0.327011  |
| 9  | 1  | 0 | -0.883866 | 0.586691  | 1.504890  |
| 10 | 1  | 0 | 0.233075  | 0.745775  | -1.344879 |
| 11 | 1  | 0 | 2.168224  | 1.696062  | -0.175900 |
| 12 | 1  | 0 | 0.873422  | 2.671424  | -0.048357 |
| 13 | 1  | 0 | -1.763714 | -1.450258 | 0.101407  |
| 14 | 1  | 0 | 2.688013  | -1.542999 | -0.304306 |

Zwitterionic cysteine (2)

SCF Done: E(RB3LYP) = -721.923194649 A.U.; No imaginary frequency

| Center Number | Atomic Number | Atomic Type | Coordinates (Angstroms) |           |           |
|---------------|---------------|-------------|-------------------------|-----------|-----------|
|               |               |             | X                       | Y         | Z         |
| 1             | 6             | 0           | -0.768907               | -0.648010 | 0.370975  |
| 2             | 16            | 0           | -2.527897               | -0.158567 | 0.114661  |
| 3             | 6             | 0           | 0.255634                | 0.116654  | -0.465741 |
| 4             | 7             | 0           | 0.170442                | 1.600555  | -0.229268 |
| 5             | 6             | 0           | 1.714900                | -0.295878 | -0.032236 |
| 6             | 8             | 0           | 2.355952                | 0.625466  | 0.552722  |
| 7             | 8             | 0           | 2.041226                | -1.467103 | -0.285385 |
| 8             | 1             | 0           | -0.590834               | -0.485572 | 1.438983  |
| 9             | 1             | 0           | -0.637762               | -1.711677 | 0.169727  |
| 10            | 1             | 0           | 0.106759                | -0.074905 | -1.529182 |
| 11            | 1             | 0           | 1.042033                | 1.761032  | 0.351110  |
| 12            | 1             | 0           | 0.248722                | 2.142212  | -1.092956 |
| 13            | 1             | 0           | -2.612395               | -0.493813 | -1.190102 |
| 14            | 1             | 0           | -0.690456               | 1.892405  | 0.246027  |

CP2<sup>carboxylate</sup>

SCF Done: E(RB3LYP) = -2575.48037866 A.U.; No imaginary frequency

| Center Number | Atomic Number | Atomic Type | Coordinates (Angstroms) |           |           |
|---------------|---------------|-------------|-------------------------|-----------|-----------|
|               |               |             | X                       | Y         | Z         |
| 1             | 6             | 0           | -3.229163               | -1.050211 | 2.301026  |
| 2             | 6             | 0           | -1.895513               | -0.776143 | 1.934670  |
| 3             | 6             | 0           | -0.885912               | -0.998236 | 2.887015  |
| 4             | 6             | 0           | -1.218758               | -1.453237 | 4.168435  |
| 5             | 6             | 0           | -2.542776               | -1.707864 | 4.513701  |
| 6             | 6             | 0           | -3.552637               | -1.512967 | 3.573007  |
| 7             | 15            | 0           | -1.495757               | -0.138406 | 0.249041  |
| 8             | 79            | 0           | 0.883662                | 0.005180  | 0.459323  |
| 9             | 8             | 0           | 2.960023                | 0.211679  | 0.900957  |
| 10            | 6             | 0           | 3.741558                | -0.742157 | 0.469551  |
| 11            | 8             | 0           | 3.372158                | -1.780525 | -0.077793 |
| 12            | 7             | 0           | 0.533955                | -0.788913 | 2.565091  |
| 13            | 6             | 0           | 1.279838                | -2.082223 | 2.678143  |
| 14            | 6             | 0           | -2.031521               | -1.476180 | -1.015480 |
| 15            | 6             | 0           | -3.573912               | -1.634911 | -1.114738 |

|    |    |   |           |           |           |
|----|----|---|-----------|-----------|-----------|
| 16 | 6  | 0 | -3.918314 | -2.770869 | -2.109910 |
| 17 | 6  | 0 | -3.303198 | -4.094974 | -1.617518 |
| 18 | 6  | 0 | -1.771626 | -3.947423 | -1.539372 |
| 19 | 6  | 0 | -1.413557 | -2.822590 | -0.540552 |
| 20 | 6  | 0 | -1.209850 | -3.602864 | -2.932046 |
| 21 | 6  | 0 | -1.834141 | -2.280934 | -3.415845 |
| 22 | 6  | 0 | -3.364464 | -2.427155 | -3.504831 |
| 23 | 6  | 0 | -1.479347 | -1.145582 | -2.427929 |
| 24 | 6  | 0 | -2.308141 | 1.594676  | 0.097176  |
| 25 | 6  | 0 | -3.802556 | 1.605040  | 0.525947  |
| 26 | 6  | 0 | -4.373909 | 3.039810  | 0.406670  |
| 27 | 6  | 0 | -4.251810 | 3.542723  | -1.043450 |
| 28 | 6  | 0 | -2.765873 | 3.551113  | -1.450021 |
| 29 | 6  | 0 | -2.209572 | 2.110602  | -1.362183 |
| 30 | 6  | 0 | -3.596878 | 3.978335  | 1.348288  |
| 31 | 6  | 0 | -2.111970 | 3.983776  | 0.939784  |
| 32 | 6  | 0 | -1.536911 | 2.552312  | 1.049931  |
| 33 | 6  | 0 | -1.974138 | 4.482562  | -0.512060 |
| 34 | 6  | 0 | 1.404696  | 0.800948  | -1.369893 |
| 35 | 6  | 0 | 1.871769  | -0.042997 | -2.378907 |
| 36 | 6  | 0 | 2.369956  | 0.511893  | -3.563848 |
| 37 | 6  | 0 | 2.410260  | 1.897285  | -3.734035 |
| 38 | 6  | 0 | 1.961156  | 2.732643  | -2.710435 |
| 39 | 6  | 0 | 1.458659  | 2.186950  | -1.521736 |
| 40 | 6  | 0 | 1.146728  | 0.231449  | 3.473531  |
| 41 | 6  | 0 | 5.248043  | -0.446065 | 0.694096  |
| 42 | 7  | 0 | 6.086464  | -1.637865 | 0.648532  |
| 43 | 6  | 0 | 5.692497  | 0.566432  | -0.372757 |
| 44 | 16 | 0 | 7.492781  | 0.943103  | -0.168692 |
| 45 | 1  | 0 | -0.441893 | -1.619231 | 4.905997  |
| 46 | 1  | 0 | -2.778815 | -2.061638 | 5.512267  |
| 47 | 1  | 0 | -4.589257 | -1.713897 | 3.823173  |
| 48 | 1  | 0 | -4.032169 | -0.898411 | 1.594242  |
| 49 | 1  | 0 | -0.321637 | -2.737044 | -0.466083 |
| 50 | 1  | 0 | -1.790439 | -3.086242 | 0.453973  |
| 51 | 1  | 0 | -1.324427 | -4.880520 | -1.174980 |
| 52 | 1  | 0 | 0.826102  | -2.817729 | 2.013183  |
| 53 | 1  | 0 | 1.251227  | -2.453503 | 3.707196  |
| 54 | 1  | 0 | 2.315011  | -1.916241 | 2.386178  |
| 55 | 1  | 0 | -0.115924 | -3.513419 | -2.888746 |
| 56 | 1  | 0 | -1.439521 | -4.410077 | -3.639878 |
| 57 | 1  | 0 | -1.426063 | -2.013267 | -4.398386 |
| 58 | 1  | 0 | -3.814318 | -1.495760 | -3.874274 |
| 59 | 1  | 0 | -3.628012 | -3.218092 | -4.219208 |
| 60 | 1  | 0 | -5.010869 | -2.859869 | -2.151863 |
| 61 | 1  | 0 | -4.005569 | -1.884152 | -0.141866 |
| 62 | 1  | 0 | -4.036259 | -0.702950 | -1.457726 |
| 63 | 1  | 0 | -3.567545 | -4.908770 | -2.305308 |
| 64 | 1  | 0 | -3.710208 | -4.360513 | -0.632564 |
| 65 | 1  | 0 | -1.897679 | -0.205924 | -2.799528 |
| 66 | 1  | 0 | -0.396253 | -1.022360 | -2.390953 |
| 67 | 1  | 0 | -1.621271 | 2.199464  | 2.085374  |
| 68 | 1  | 0 | -0.469664 | 2.575872  | 0.803938  |
| 69 | 1  | 0 | -1.540070 | 4.632952  | 1.614132  |
| 70 | 1  | 0 | 2.172020  | 0.405282  | 3.145459  |
| 71 | 1  | 0 | 1.150018  | -0.121989 | 4.509232  |
| 72 | 1  | 0 | 0.575169  | 1.158231  | 3.405944  |
| 73 | 1  | 0 | -4.007105 | 4.994963  | 1.289757  |

|    |   |   |           |           |           |
|----|---|---|-----------|-----------|-----------|
| 74 | 1 | 0 | -3.704166 | 3.646895  | 2.389828  |
| 75 | 1 | 0 | -5.429598 | 3.003780  | 0.702727  |
| 76 | 1 | 0 | -4.826491 | 2.897022  | -1.721044 |
| 77 | 1 | 0 | -4.672853 | 4.553181  | -1.126494 |
| 78 | 1 | 0 | -2.663511 | 3.891823  | -2.487626 |
| 79 | 1 | 0 | -2.799277 | 1.469272  | -2.025398 |
| 80 | 1 | 0 | -1.174226 | 2.085794  | -1.715981 |
| 81 | 1 | 0 | -4.394827 | 0.925235  | -0.095253 |
| 82 | 1 | 0 | -3.902040 | 1.282334  | 1.565663  |
| 83 | 1 | 0 | -2.356378 | 5.508437  | -0.593311 |
| 84 | 1 | 0 | -0.916849 | 4.511217  | -0.807256 |
| 85 | 1 | 0 | 1.877767  | -1.118569 | -2.245699 |
| 86 | 1 | 0 | 2.731206  | -0.147732 | -4.348223 |
| 87 | 1 | 0 | 1.999463  | 3.812475  | -2.824742 |
| 88 | 1 | 0 | 1.133456  | 2.853640  | -0.730290 |
| 89 | 1 | 0 | 2.797642  | 2.322889  | -4.655279 |
| 90 | 1 | 0 | 5.358545  | 0.019173  | 1.678161  |
| 91 | 1 | 0 | 5.911567  | -2.204819 | 1.476985  |
| 92 | 1 | 0 | 5.785329  | -2.211239 | -0.140473 |
| 93 | 1 | 0 | 7.444880  | 2.181751  | -0.703365 |
| 94 | 1 | 0 | 5.523506  | 0.158851  | -1.374490 |
| 95 | 1 | 0 | 5.122174  | 1.491066  | -0.271381 |

TS<sup>rd-carboxylate</sup>

SCF Done: E(RB3LYP) = -2575.43500864 A.U.; An imaginary frequency of -388.9289 cm<sup>-1</sup>

| Center<br>Number | Atomic<br>Number | Atomic<br>Type | Coordinates (Angstroms) |           |           |
|------------------|------------------|----------------|-------------------------|-----------|-----------|
|                  |                  |                | X                       | Y         | Z         |
| 1                | 6                | 0              | 3.602622                | -3.474010 | 2.477241  |
| 2                | 6                | 0              | 3.923950                | -2.007749 | 2.825313  |
| 3                | 6                | 0              | 3.089020                | -1.566295 | 4.041914  |
| 4                | 6                | 0              | 1.591845                | -1.699837 | 3.703325  |
| 5                | 6                | 0              | 1.264709                | -3.166633 | 3.364765  |
| 6                | 6                | 0              | 2.102254                | -3.603328 | 2.147937  |
| 7                | 6                | 0              | 3.594899                | -1.101411 | 1.614393  |
| 8                | 6                | 0              | 2.090278                | -1.223965 | 1.255766  |
| 9                | 6                | 0              | 1.249376                | -0.801647 | 2.492855  |
| 10               | 6                | 0              | 1.763088                | -2.709673 | 0.933360  |
| 11               | 15               | 0              | 1.544744                | -0.187430 | -0.259193 |
| 12               | 6                | 0              | 2.242103                | 1.589168  | -0.361027 |
| 13               | 6                | 0              | 3.765744                | 1.663699  | -0.648526 |
| 14               | 6                | 0              | 4.214900                | 3.142625  | -0.734974 |
| 15               | 6                | 0              | 3.901681                | 3.866140  | 0.588675  |
| 16               | 6                | 0              | 2.383919                | 3.814483  | 0.850424  |
| 17               | 6                | 0              | 1.936570                | 2.338674  | 0.963393  |
| 18               | 6                | 0              | 3.472757                | 3.835037  | -1.893181 |
| 19               | 6                | 0              | 1.956897                | 3.776888  | -1.627473 |
| 20               | 6                | 0              | 1.500131                | 2.303656  | -1.527357 |
| 21               | 6                | 0              | 1.632719                | 4.501753  | -0.306339 |
| 22               | 79               | 0              | -0.810136               | -0.118526 | -0.413444 |
| 23               | 7                | 0              | -0.253787               | -1.328928 | -2.609602 |
| 24               | 6                | 0              | -0.837632               | -0.474749 | -3.666681 |
| 25               | 6                | 0              | -2.096564               | 0.984842  | 1.137401  |
| 26               | 6                | 0              | -2.302565               | 0.325356  | 2.341521  |
| 27               | 6                | 0              | -2.407205               | 1.123602  | 3.488949  |
| 28               | 6                | 0              | -2.351383               | 2.516281  | 3.402712  |

|    |    |   |           |           |           |
|----|----|---|-----------|-----------|-----------|
| 29 | 6  | 0 | -2.201299 | 3.132250  | 2.155648  |
| 30 | 6  | 0 | -2.101201 | 2.366959  | 0.989580  |
| 31 | 8  | 0 | -2.979181 | 0.277545  | -0.384860 |
| 32 | 6  | 0 | -3.748198 | -0.803379 | -0.187601 |
| 33 | 6  | 0 | -5.190631 | -0.591489 | -0.706095 |
| 34 | 6  | 0 | -5.921593 | 0.318692  | 0.296392  |
| 35 | 7  | 0 | -5.917827 | -1.834487 | -0.900918 |
| 36 | 6  | 0 | 2.096899  | -1.072800 | -1.780057 |
| 37 | 6  | 0 | 1.181900  | -1.503073 | -2.767342 |
| 38 | 6  | 0 | 1.662044  | -2.139152 | -3.921174 |
| 39 | 6  | 0 | 3.021723  | -2.372404 | -4.107482 |
| 40 | 6  | 0 | 3.930295  | -1.974197 | -3.127301 |
| 41 | 6  | 0 | 3.467905  | -1.331644 | -1.982108 |
| 42 | 6  | 0 | -0.950836 | -2.632916 | -2.531078 |
| 43 | 16 | 0 | -7.661267 | 0.588627  | -0.268824 |
| 44 | 1  | 0 | 0.959652  | -2.463811 | -4.682152 |
| 45 | 1  | 0 | 3.366196  | -2.868445 | -5.009927 |
| 46 | 1  | 0 | 4.993114  | -2.157944 | -3.249632 |
| 47 | 1  | 0 | 4.191248  | -1.028694 | -1.236675 |
| 48 | 1  | 0 | 0.697974  | -2.813428 | 0.684635  |
| 49 | 1  | 0 | 2.334218  | -3.047072 | 0.061706  |
| 50 | 1  | 0 | 1.867177  | -4.642564 | 1.885635  |
| 51 | 1  | 0 | -0.527708 | -3.220647 | -1.713517 |
| 52 | 1  | 0 | -0.865416 | -3.205560 | -3.465147 |
| 53 | 1  | 0 | -2.009826 | -2.455780 | -2.328267 |
| 54 | 1  | 0 | 0.193487  | -3.276069 | 3.147080  |
| 55 | 1  | 0 | 1.485949  | -3.811559 | 4.225604  |
| 56 | 1  | 0 | 0.985680  | -1.369883 | 4.556494  |
| 57 | 1  | 0 | 3.327257  | -0.527633 | 4.308659  |
| 58 | 1  | 0 | 3.335628  | -2.187225 | 4.913357  |
| 59 | 1  | 0 | 4.993109  | -1.903217 | 3.048685  |
| 60 | 1  | 0 | 4.225779  | -1.397960 | 0.770190  |
| 61 | 1  | 0 | 3.844587  | -0.064882 | 1.865306  |
| 62 | 1  | 0 | 3.859447  | -4.125723 | 3.322842  |
| 63 | 1  | 0 | 4.208551  | -3.802662 | 1.621963  |
| 64 | 1  | 0 | 1.435504  | 0.245542  | 2.751992  |
| 65 | 1  | 0 | 0.182386  | -0.889355 | 2.264801  |
| 66 | 1  | 0 | 1.700488  | 1.786288  | -2.474282 |
| 67 | 1  | 0 | 0.415985  | 2.274375  | -1.363720 |
| 68 | 1  | 0 | 1.413863  | 4.249573  | -2.455592 |
| 69 | 1  | 0 | -1.893166 | -0.304018 | -3.435877 |
| 70 | 1  | 0 | -0.769407 | -0.936465 | -4.661648 |
| 71 | 1  | 0 | -0.319961 | 0.486743  | -3.683709 |
| 72 | 1  | 0 | 3.799818  | 4.879662  | -1.980414 |
| 73 | 1  | 0 | 3.711009  | 3.342130  | -2.845486 |
| 74 | 1  | 0 | 5.296007  | 3.159364  | -0.921936 |
| 75 | 1  | 0 | 4.445772  | 3.394212  | 1.418136  |
| 76 | 1  | 0 | 4.239873  | 4.909511  | 0.534972  |
| 77 | 1  | 0 | 2.151061  | 4.318031  | 1.797086  |
| 78 | 1  | 0 | 2.472519  | 1.870409  | 1.796507  |
| 79 | 1  | 0 | 0.865051  | 2.288349  | 1.191700  |
| 80 | 1  | 0 | 4.338439  | 1.156135  | 0.134215  |
| 81 | 1  | 0 | 3.995504  | 1.170802  | -1.598284 |
| 82 | 1  | 0 | 1.930364  | 5.556585  | -0.373434 |
| 83 | 1  | 0 | 0.550562  | 4.483998  | -0.119302 |
| 84 | 1  | 0 | -2.363114 | -0.753610 | 2.398642  |
| 85 | 1  | 0 | -2.537992 | 0.636184  | 4.450951  |
| 86 | 1  | 0 | -2.176954 | 4.215174  | 2.075188  |

|    |   |   |           |           |           |
|----|---|---|-----------|-----------|-----------|
| 87 | 1 | 0 | -2.018592 | 2.833178  | 0.014579  |
| 88 | 1 | 0 | -2.443531 | 3.120685  | 4.299552  |
| 89 | 1 | 0 | -5.127097 | -0.069229 | -1.665379 |
| 90 | 1 | 0 | -5.530484 | -2.342344 | -1.694268 |
| 91 | 1 | 0 | -5.783754 | -2.435524 | -0.087860 |
| 92 | 1 | 0 | -7.820630 | 1.786656  | 0.332078  |
| 93 | 8 | 0 | -3.377212 | -1.827561 | 0.356102  |
| 94 | 1 | 0 | -5.933165 | -0.143491 | 1.288217  |
| 95 | 1 | 0 | -5.416869 | 1.283685  | 0.365991  |

CP3<sup>carboxylate</sup>

SCF Done: E(RB3LYP) = -2575.49704007 A.U.; No imaginary frequency

| Center<br>Number | Atomic<br>Number | Atomic<br>Type | Coordinates (Angstroms) |           |           |
|------------------|------------------|----------------|-------------------------|-----------|-----------|
|                  |                  |                | X                       | Y         | Z         |
| 1                | 6                | 0              | -3.323307               | -0.119145 | 2.289412  |
| 2                | 6                | 0              | -1.955868               | 0.035719  | 1.976242  |
| 3                | 6                | 0              | -1.045595               | 0.241757  | 3.043950  |
| 4                | 6                | 0              | -1.533347               | 0.272095  | 4.359579  |
| 5                | 6                | 0              | -2.885755               | 0.110414  | 4.646316  |
| 6                | 6                | 0              | -3.788051               | -0.084630 | 3.601834  |
| 7                | 15               | 0              | -1.448116               | -0.024769 | 0.198790  |
| 8                | 79               | 0              | 0.845883                | 0.172575  | 0.007135  |
| 9                | 8                | 0              | 3.122957                | 0.412909  | -0.419852 |
| 10               | 6                | 0              | 3.978094                | -0.484926 | -1.067439 |
| 11               | 8                | 0              | 4.992900                | -0.112795 | -1.590380 |
| 12               | 7                | 0              | 0.367784                | 0.432700  | 2.820052  |
| 13               | 6                | 0              | 1.191261                | -0.613709 | 3.440797  |
| 14               | 6                | 0              | -1.917068               | -1.756855 | -0.480233 |
| 15               | 6                | 0              | -3.429632               | -2.108594 | -0.474018 |
| 16               | 6                | 0              | -3.641184               | -3.546123 | -1.011596 |
| 17               | 6                | 0              | -2.901541               | -4.546961 | -0.103650 |
| 18               | 6                | 0              | -1.396058               | -4.219674 | -0.111290 |
| 19               | 6                | 0              | -1.174006               | -2.785684 | 0.420782  |
| 20               | 6                | 0              | -0.848366               | -4.326053 | -1.547602 |
| 21               | 6                | 0              | -1.598055               | -3.331006 | -2.453096 |
| 22               | 6                | 0              | -3.103652               | -3.656633 | -2.450488 |
| 23               | 6                | 0              | -1.388588               | -1.890683 | -1.934903 |
| 24               | 6                | 0              | -2.221541               | 1.510701  | -0.648023 |
| 25               | 6                | 0              | -3.771095               | 1.513228  | -0.717503 |
| 26               | 6                | 0              | -4.268053               | 2.827104  | -1.369202 |
| 27               | 6                | 0              | -3.702255               | 2.946850  | -2.796628 |
| 28               | 6                | 0              | -2.162691               | 2.967613  | -2.731440 |
| 29               | 6                | 0              | -1.659956               | 1.654541  | -2.089631 |
| 30               | 6                | 0              | -3.806210               | 4.031125  | -0.526171 |
| 31               | 6                | 0              | -2.266396               | 4.048922  | -0.467421 |
| 32               | 6                | 0              | -1.761633               | 2.742363  | 0.185282  |
| 33               | 6                | 0              | -1.693036               | 4.170696  | -1.891913 |
| 34               | 6                | 0              | 3.559801                | 1.769652  | -0.340502 |
| 35               | 6                | 0              | 3.219824                | 2.646764  | -1.363751 |
| 36               | 6                | 0              | 3.611129                | 3.983127  | -1.247379 |
| 37               | 6                | 0              | 4.328603                | 4.411743  | -0.126859 |
| 38               | 6                | 0              | 4.659887                | 3.505556  | 0.884320  |
| 39               | 6                | 0              | 4.275813                | 2.165705  | 0.782847  |
| 40               | 6                | 0              | 0.823492                | 1.778207  | 3.197894  |
| 41               | 6                | 0              | 3.494874                | -1.936694 | -0.979999 |

|    |    |   |           |           |           |
|----|----|---|-----------|-----------|-----------|
| 42 | 7  | 0 | 4.056575  | -2.775903 | -2.024283 |
| 43 | 6  | 0 | 3.869315  | -2.479076 | 0.412890  |
| 44 | 16 | 0 | 3.349647  | -4.247532 | 0.538896  |
| 45 | 1  | 0 | -0.832807 | 0.431028  | 5.173801  |
| 46 | 1  | 0 | -3.230394 | 0.140823  | 5.675916  |
| 47 | 1  | 0 | -4.848266 | -0.208554 | 3.799876  |
| 48 | 1  | 0 | -4.048216 | -0.268990 | 1.500857  |
| 49 | 1  | 0 | -0.098889 | -2.564899 | 0.438564  |
| 50 | 1  | 0 | -1.537488 | -2.713549 | 1.453187  |
| 51 | 1  | 0 | -0.859027 | -4.916423 | 0.544783  |
| 52 | 1  | 0 | 0.850607  | -1.596711 | 3.104975  |
| 53 | 1  | 0 | 1.167383  | -0.591181 | 4.543035  |
| 54 | 1  | 0 | 2.229884  | -0.476792 | 3.122513  |
| 55 | 1  | 0 | 0.228930  | -4.112177 | -1.558460 |
| 56 | 1  | 0 | -0.976868 | -5.349335 | -1.924810 |
| 57 | 1  | 0 | -1.205465 | -3.388377 | -3.476239 |
| 58 | 1  | 0 | -3.642460 | -2.964607 | -3.111877 |
| 59 | 1  | 0 | -3.272649 | -4.670379 | -2.837330 |
| 60 | 1  | 0 | -4.718006 | -3.757037 | -0.998510 |
| 61 | 1  | 0 | -3.831837 | -2.059050 | 0.541775  |
| 62 | 1  | 0 | -3.995733 | -1.404163 | -1.092391 |
| 63 | 1  | 0 | -3.066125 | -5.572325 | -0.460900 |
| 64 | 1  | 0 | -3.296547 | -4.495323 | 0.920056  |
| 65 | 1  | 0 | -1.918849 | -1.197581 | -2.596290 |
| 66 | 1  | 0 | -0.323615 | -1.630513 | -1.977672 |
| 67 | 1  | 0 | -2.148352 | 2.672372  | 1.208760  |
| 68 | 1  | 0 | -0.665685 | 2.763390  | 0.250798  |
| 69 | 1  | 0 | -1.926291 | 4.893221  | 0.145576  |
| 70 | 1  | 0 | 1.863395  | 1.900660  | 2.879024  |
| 71 | 1  | 0 | 0.770708  | 1.963556  | 4.283660  |
| 72 | 1  | 0 | 0.215240  | 2.529096  | 2.687112  |
| 73 | 1  | 0 | -4.176849 | 4.964896  | -0.969554 |
| 74 | 1  | 0 | -4.223592 | 3.967320  | 0.487927  |
| 75 | 1  | 0 | -5.364394 | 2.795939  | -1.404288 |
| 76 | 1  | 0 | -4.044157 | 2.104185  | -3.412862 |
| 77 | 1  | 0 | -4.072682 | 3.864986  | -3.271675 |
| 78 | 1  | 0 | -1.747529 | 3.035118  | -3.745027 |
| 79 | 1  | 0 | -1.979188 | 0.812053  | -2.711344 |
| 80 | 1  | 0 | -0.562597 | 1.645523  | -2.068975 |
| 81 | 1  | 0 | -4.131711 | 0.662839  | -1.305787 |
| 82 | 1  | 0 | -4.201200 | 1.430709  | 0.285154  |
| 83 | 1  | 0 | -2.029442 | 5.108026  | -2.354732 |
| 84 | 1  | 0 | -0.595470 | 4.204024  | -1.857330 |
| 85 | 1  | 0 | 2.662312  | 2.292645  | -2.224820 |
| 86 | 1  | 0 | 3.355165  | 4.685172  | -2.035014 |
| 87 | 1  | 0 | 5.218050  | 3.836796  | 1.754621  |
| 88 | 1  | 0 | 4.524506  | 1.444754  | 1.554788  |
| 89 | 1  | 0 | 4.629885  | 5.451450  | -0.042259 |
| 90 | 1  | 0 | 2.404819  | -1.949839 | -1.075858 |
| 91 | 1  | 0 | 3.687103  | -2.501293 | -2.932644 |
| 92 | 1  | 0 | 5.066199  | -2.641023 | -2.070822 |
| 93 | 1  | 0 | 3.171909  | -4.242862 | 1.876742  |
| 94 | 1  | 0 | 4.950302  | -2.407040 | 0.566181  |
| 95 | 1  | 0 | 3.366276  | -1.905027 | 1.192916  |



### 3. Solution-Phase Electronic Energies and Thermal Corrections

*Table S1.* Single Point Electronic Energies, Zero-Point Vibrational Energies, Thermal Corrections to Enthalpies and Gibbs Free Energies <sup>a</sup>

| Stationary point                                                | SP (a.u., in water) | ZPE (a.u.) | $\Delta H$ (a.u.) | $\Delta G$ (a.u.) |
|-----------------------------------------------------------------|---------------------|------------|-------------------|-------------------|
| <i>Favorable pathway for S-arylation</i>                        |                     |            |                   |                   |
| <b>CP0</b>                                                      | -2314.37728692      | 0.731169   | 0.766326          | 0.666974          |
| <b>1</b>                                                        | -702.05615433       | 0.120034   | 0.129854          | 0.085997          |
| <b>CP1</b>                                                      | -3016.42775083      | 0.850817   | 0.89649           | 0.771399          |
| HCl                                                             | -460.79600032       | 0.00664    | 0.009945          | -0.011255         |
| <b>CP2</b>                                                      | -2555.62089144      | 0.842659   | 0.885671          | 0.767788          |
| <b>TS<sup>rd</sup></b>                                          | -2555.60197103      | 0.839445   | 0.882797          | 0.76085           |
| <b>CP3</b>                                                      | -2555.66109952      | 0.840762   | 0.884578          | 0.761307          |
| <b>Prod</b>                                                     | -933.11416900       | 0.203046   | 0.217461          | 0.160419          |
| <b>SbF<sub>6</sub><sup>-</sup></b>                              | -604.73322838       | 0.013364   | 0.022634          | -0.020148         |
| <b>LAu(I)-SbF<sub>6</sub></b>                                   | -2227.29357958      | 0.650631   | 0.68956           | 0.578252          |
| <b>Cl<sup>-</sup></b>                                           | -460.36592171       | 0          | 0.00236           | -0.015023         |
| <b>LAu(I)-Cl</b>                                                | -2082.94143912      | 0.636932   | 0.667568          | 0.576341          |
| <i>Isomeric pathways for reductive elimination</i>              |                     |            |                   |                   |
| <b>CP2-iso</b>                                                  | -2555.58050063      | 0.839771   | 0.883901          | 0.761798          |
| <b>TS<sup>rd</sup>-iso</b>                                      | -2555.57892494      | 0.838752   | 0.882396          | 0.759854          |
| <b>CP3-iso</b>                                                  | -2555.65070232      | 0.840672   | 0.884524          | 0.760729          |
|                                                                 |                     |            |                   |                   |
| <b>CP2-cis</b>                                                  | -2555.61288320      | 0.842642   | 0.885728          | 0.766713          |
| <b>TS<sup>rd</sup>-cis</b>                                      | -2555.59679983      | 0.840057   | 0.883142          | 0.763763          |
| <i>Chemoselectivity of possible N-arylation and O-arylation</i> |                     |            |                   |                   |
| <b>CP1<sup>amino</sup></b>                                      | -3016.43182834      | 0.854611   | 0.899988          | 0.77694           |
| <b>CP2<sup>amino</sup></b>                                      | -2555.59011940      | 0.839433   | 0.882378          | 0.764458          |
| <b>TS<sup>rd</sup>-amino</b>                                    | -2555.56744685      | 0.837209   | 0.879809          | 0.762812          |
| <b>CP3<sup>amino</sup></b>                                      | -2555.66126622      | 0.840075   | 0.883275          | 0.761672          |
| <b>TS<sup>neutralNH2</sup></b>                                  | -3016.38979831      | 0.852017   | 0.896983          | 0.775451          |
| <b>Cysteine</b>                                                 | -721.92113517       | 0.108047   | 0.117242          | 0.07458           |
| <b>2</b>                                                        | -721.92319465       | 0.109627   | 0.11847           | 0.076625          |
| <b>CP2<sup>carboxylate</sup></b>                                | -2575.48037866      | 0.828021   | 0.870784          | 0.752915          |
| <b>TS<sup>rd</sup>-carboxylate</b>                              | -2575.43500864      | 0.823701   | 0.866862          | 0.745135          |
| <b>CP3<sup>carboxylate</sup></b>                                | -2575.49704007      | 0.825291   | 0.869138          | 0.744576          |

- a. SP: Solution-phase single point electronic energy;  
 ZPE: Zero-point vibrational energy;  
 $\Delta H$ : Thermal correction to enthalpy;  
 $\Delta G$ : Thermal correction to Gibbs free energy.

#### 4. Full citation of Gaussian09 program

*Gaussian 09, Revision D.01*, M. J. Frisch, G. W. Trucks, H. B. Schlegel, G. E. Scuseria, M. A. Robb, J. R. Cheeseman, G. Scalmani, V. Barone, B. Mennucci, G. A. Petersson, H. Nakatsuji, M. Caricato, X. Li, H. P. Hratchian, A. F. Izmaylov, J. Bloino, G. Zheng, J. L. Sonnenberg, M. Hada, M. Ehara, K. Toyota, R. Fukuda, J. Hasegawa, M. Ishida, T. Nakajima, Y. Honda, O. Kitao, H. Nakai, T. Vreven, J. A. Montgomery, Jr., J. E. Peralta, F. Ogliaro, M. Bearpark, J. J. Heyd, E. Brothers, K. N. Kudin, V. N. Staroverov, T. Keith, R. Kobayashi, J. Normand, K. Raghavachari, A. Rendell, J. C. Burant, S. S. Iyengar, J. Tomasi, M. Cossi, N. Rega, J. M. Millam, M. Klene, J. E. Knox, J. B. Cross, V. Bakken, C. Adamo, J. Jaramillo, R. Gomperts, R. E. Stratmann, O. Yazyev, A. J. Austin, R. Cammi, C. Pomelli, J. W. Ochterski, R. L. Martin, K. Morokuma, V. G. Zakrzewski, G. A. Voth, P. Salvador, J. J. Dannenberg, S. Dapprich, A. D. Daniels, O. Farkas, J. B. Foresman, J. V. Ortiz, J. Cioslowski, and D. J. Fox, Gaussian, Inc., Wallingford CT, 2013.
